# Supplementary material for: Combined experimental and theoretical studies on a series of mononuclear LnIIIsingle-molecule magnets: dramatic influence of remote substitution on the magnetic dynamics in Dy analogues
Source: Royal Society of Chemistry journal article supplement (doi:10.1039/d2dt03354b), 2022-12-21
Supplement: d2dt03354b1.pdf [file d2dt03354b1.pdf]

## Supplementary Information

# A combined experimental and theoretical studies on a series of mononuclear Ln<sup>III</sup> single-molecule magnets: a dramatic influence of remote substitution on magnetic dynamics in Dy analogues

Kuheli Pramanik,<sup>a,b</sup> Zvonko Jagličić,<sup>c</sup> Radovan Herchel,<sup>d</sup> Paula Brandão,<sup>e</sup> Narayan Ch. Jana,<sup>b</sup> and Anangamohan Panja<sup>\*a,b</sup>

<sup>a</sup> Department of Chemistry, Gokhale Memorial Girls' College, 1/1 Harish Mukherjee Road, Kolkata-700020, India. E-mail: ampanja@yahoo.co.in

<sup>b</sup> Department of Chemistry, Panskura Banamali College, Panskura RS, WB 721152, India

<sup>c</sup> Institute of Mathematics, Physics and Mechanics & Faculty of Civil and Geodetic Engineering, University of Ljubljana, Jadranska 19, 1000 Ljubljana, Slovenia

<sup>d</sup> Department of Inorganic Chemistry, Faculty of Science, Palacký University, 17. listopadu 12, 77146 Olomouc, Czech Republic

<sup>e</sup> Department of Chemistry, CICECO-Aveiro Institute of Materials, University of Aveiro, 3810-193 Aveiro, Portugal

\* Corresponding author e-mail: ampanja@yahoo.co.in

## Table of Contents

|                                                                                                                                                                                                         |    |
|---------------------------------------------------------------------------------------------------------------------------------------------------------------------------------------------------------|----|
| <b>Table S1:</b> Crystallographic parameters of the complexes. ....                                                                                                                                     | 5  |
| <b>Table S2.</b> SHAPE analysis of the LnIII ion in complexes 1Dy–6Gd. ....                                                                                                                             | 6  |
| <b>Table S3.</b> Relaxation fitting parameters from the least-square fitting of the Cole-Cole plots of 1 by the single-component generalized Debye model at zero and 1000 Oe dc fields. ....            | 6  |
| <b>Table S4.</b> Relaxation fitting parameters from the least-square fitting of the Cole-Cole plots of 6 by the single-component generalized Debye model at zero and 1000 Oe dc fields.....             | 7  |
| <b>Table S5.</b> Relaxation fitting parameters from the least-square fitting of the Cole-Cole plots of 2 by the single-component generalized Debye model at 1000 Oe dc fields. ....                     | 9  |
| <b>Table S6.</b> Relaxation fitting parameters from the least-square fitting of the Cole-Cole plots of 4 by the single-component generalized Debye model at 1000 Oe dc fields. ....                     | 10 |
| <b>Table S7.</b> Relaxation fitting parameters from the least-square fitting of the Cole-Cole plots of 5 by the single-component generalized Debye model at 1000 Oe dc fields. ....                     | 11 |
| <b>Table S8.</b> The splitting of the lowest multiplets for Ln <sup>III</sup> ions in 1-6 compounds calculated by CASSCF method .....                                                                   | 12 |
| <b>Table S9.</b> The g-factors for the effective spin 1/2 calculated by CASSCF for lowest Kramers (pseudo)doublets of 1-6. ....                                                                         | 13 |
| <b>Table S10.</b> Comparison of $U_{\text{eff}}$ value of this work with the other reported mononuclear Yb <sup>III</sup> SMMs. <sup>a</sup> .....                                                      | 14 |
| <b>Table S11.</b> Comparison of $U_{\text{eff}}$ value of this work with the other reported Dy <sup>III</sup> SMMs with N-salicylideneaniline type ligands in the zwitterionic form. <sup>a</sup> ..... | 15 |
| <b>Fig. S1.</b> <sup>1</sup> H NMR spectrum of ligand LH in CDCl <sub>3</sub> at r.t. ....                                                                                                              | 16 |
| <b>Fig. S2.</b> <sup>13</sup> C NMR of ligand LH in CDCl <sub>3</sub> at r.t.....                                                                                                                       | 16 |
| <b>Fig. S3.</b> IR spectra of the ligands and complexes 1-6.....                                                                                                                                        | 17 |
| <b>Fig. S5.</b> Crystal structures of complexes 1-5 with ellipsoid plots (probability level 30 %).....                                                                                                  | 19 |
| <b>Fig. S6:</b> Crystal packing of complex 1 focusing on the $\pi\cdots\pi$ stacking interaction .....                                                                                                  | 19 |
| <b>Fig. S7.</b> Isothermal magnetization curves for complexes 1-6 at 2 K. ....                                                                                                                          | 20 |
| <b>Fig. S8.</b> Frequency dependent out-of-phase ac susceptibility plots of 1 in zero dc field (left) and 1 kOe dc field (right). ....                                                                  | 20 |
| <b>Fig. S9.</b> Frequency dependent in-phase and out-of-phase ac susceptibility plots of 6 at indicated dc field. ....                                                                                  | 21 |
| <b>Fig. S10.</b> Cole-Cole plot for 1 at zero dc field (left) and 1 kOe dc field (right) .....                                                                                                          | 22 |
| <b>Fig. S11.</b> Cole-Cole plot for 6 at zero dc field.....                                                                                                                                             | 22 |
| <b>Fig. S12.</b> Out-of-phase ac susceptibility as a function of dc magnetic field (left) and frequency (right) for 1 measured at 2 K.....                                                              | 23 |
| <b>Fig. S13.</b> Out-of-phase ac susceptibility as a function of dc magnetic field (left) and frequency (right) for 2 measured at 2 K.....                                                              | 23 |

|                                                                                                                                                                                                                                                                                                                                                                                                                                                                                                                                                                                                                                       |    |
|---------------------------------------------------------------------------------------------------------------------------------------------------------------------------------------------------------------------------------------------------------------------------------------------------------------------------------------------------------------------------------------------------------------------------------------------------------------------------------------------------------------------------------------------------------------------------------------------------------------------------------------|----|
| <b>Fig. S14.</b> Out-of-phase ac susceptibility as a function of dc magnetic field (left) and frequency (right) for <b>3</b> measured at 2 K.....                                                                                                                                                                                                                                                                                                                                                                                                                                                                                     | 24 |
| <b>Fig. S15.</b> Out-of-phase ac susceptibility as a function of dc magnetic field (left) and frequency (right) for <b>4</b> measured at 1.9 K.....                                                                                                                                                                                                                                                                                                                                                                                                                                                                                   | 24 |
| <b>Fig. S16.</b> Out-of-phase ac susceptibility as a function of dc magnetic field (left) and frequency (right) for <b>5</b> measured at 2 K.....                                                                                                                                                                                                                                                                                                                                                                                                                                                                                     | 25 |
| <b>Fig. S17.</b> Out-of-phase ac susceptibility as a function of dc magnetic field (left) and frequency (right) for <b>6</b> measured at 2 K.....                                                                                                                                                                                                                                                                                                                                                                                                                                                                                     | 25 |
| <b>Fig. S18.</b> The plot of magnetisation relaxation time in the form of $\ln(\tau)$ vs. $T^{-1}$ (left) and $\ln(\tau)$ vs. $\ln(T)$ (right); solid lines in the plots denoting the best fit considering only two Orbach like relaxations (left) and the linear fit (right); insets showing the best fit parameters.....                                                                                                                                                                                                                                                                                                            | 26 |
| <b>Fig. S19.</b> Frequency dependent in-phase and out-of-phase ac susceptibility plots of <b>2</b> at indicated dc field.....                                                                                                                                                                                                                                                                                                                                                                                                                                                                                                         | 26 |
| <b>Fig. S20.</b> Frequency dependent in-phase and out-of-phase ac susceptibility plots of <b>4</b> at indicated dc field.....                                                                                                                                                                                                                                                                                                                                                                                                                                                                                                         | 27 |
| <b>Fig. S22</b> The molecular structure of complex <b>1</b> derived from the experimental X-ray geometry used for CASSCF calculations done in ORCA overlaid with principal axis of g-tensor of the first Kramers doublet (x/y/z-axes colored as red/green/blue arrows).....                                                                                                                                                                                                                                                                                                                                                           | 28 |
| <b>Fig. S23</b> The molecular structure of complex <b>6</b> derived from the experimental X-ray geometry used for CASSCF calculations done in ORCA overlaid with principal axis of g-tensor of the first Kramers doublet (x/y/z-axes colored as red/green/blue arrows).....                                                                                                                                                                                                                                                                                                                                                           | 29 |
| <b>Fig. S24</b> The molecular structure of complex <b>4</b> derived from the experimental X-ray geometry used for CASSCF calculations done in ORCA overlaid with principal axis of g-tensor of the first Kramers doublet (x/y/z-axes colored as red/green/blue arrows).....                                                                                                                                                                                                                                                                                                                                                           | 30 |
| <b>Fig. S25</b> The molecular structure of complex <b>5</b> derived from the experimental X-ray geometry used for CASSCF calculations done in ORCA overlaid with principal axis of g-tensor of the first Kramers doublet (x/y/z-axes colored as red/green/blue arrows).....                                                                                                                                                                                                                                                                                                                                                           | 31 |
| <b>Fig. S26</b> The molecular structure of complex <b>2</b> derived from the experimental X-ray geometry used for CASSCF calculations done in ORCA overlaid with principal axis of g-tensor of the first Kramers doublet (x/y/z-axes colored as red/green/blue arrows).....                                                                                                                                                                                                                                                                                                                                                           | 32 |
| <b>Fig. S27</b> The molecular structure of complex <b>3</b> derived from the experimental X-ray geometry used for CASSCF calculations done in ORCA overlaid with principal axis of g-tensor of the first Kramers doublet (x/y/z-axes colored as red/green/blue arrows).....                                                                                                                                                                                                                                                                                                                                                           | 33 |
| <b>Fig. S28</b> The analysis of magnetic properties of <b>1</b> by POLY_ANISO module. Top: The molecular structure of supramolecular dimer of <b>1</b> derived from the experimental X-ray geometry and calculated magnetic data for such dimer using POLY_ANISO program based on respective CASSCF calculations without dipolar interaction (black line) / with dipolar interaction (red line). Bottom: The fit of experimental magnetic data utilizing CASSCF calculations, POLY_ANISO program and homemade routine with the exchange parameter $J_Dy-Dy = -0.180 \text{ cm}^{-1}$ , scaling factor for calculated data: 0.973..... | 34 |

**Fig. S29** The analysis of magnetic properties of **6** by POLY\_ANISO module. *Top*: The molecular structure of supramolecular dimer of **6** derived from the experimental X-ray geometry and calculated magnetic data for such dimer using POLY\_ANISO program based on respective CASSCF calculations without dipolar interaction (black line) / with dipolar interaction (red line). *Bottom*: The fit of experimental magnetic data utilizing CASSCF calculations, POLY\_ANISO program and homemade routine with the exchange parameter  $J_{Dy-Dy} = -0.0024 \text{ cm}^{-1}$ , scaling factor for calculated data: 0.994. ....35

References .....36

**Table S1:** Crystallographic parameters of the complexes.

|                                             | 1                                                                      | 2                                                                      | 3                                                                       | 4                                                                      | 5                                                                      | 6                                                                      |
|---------------------------------------------|------------------------------------------------------------------------|------------------------------------------------------------------------|-------------------------------------------------------------------------|------------------------------------------------------------------------|------------------------------------------------------------------------|------------------------------------------------------------------------|
| Empirical formula                           | C <sub>30</sub> H <sub>32</sub> N <sub>5</sub> O <sub>16</sub> Dy      | C <sub>30</sub> H <sub>32</sub> N <sub>5</sub> O <sub>16</sub> Tb      | C <sub>30</sub> H <sub>32</sub> N <sub>5</sub> O <sub>16</sub> Ho       | C <sub>30</sub> H <sub>32</sub> N <sub>5</sub> O <sub>16</sub> Er      | C <sub>30</sub> H <sub>32</sub> N <sub>5</sub> O <sub>16</sub> Yb      | C <sub>32</sub> H <sub>36</sub> N <sub>5</sub> O <sub>16</sub> Dy      |
| Formula weight                              | 881.10                                                                 | 877.52                                                                 | 883.53                                                                  | 885.86                                                                 | 891.64                                                                 | 909.16                                                                 |
| Temperature/K                               | 150(2)                                                                 | 150(2)                                                                 | 150(2)                                                                  | 150(2)                                                                 | 150(2)                                                                 | 150(2)                                                                 |
| Crystal system                              | triclinic                                                              | triclinic                                                              | triclinic                                                               | triclinic                                                              | triclinic                                                              | triclinic                                                              |
| Space group                                 | $\bar{p}1$                                                             | $\bar{p}1$                                                             | $\bar{p}1$                                                              | $\bar{p}1$                                                             | $\bar{p}1$                                                             | $\bar{p}1$                                                             |
| <i>a</i> /Å                                 | 10.2927(12)                                                            | 10.3031(10)                                                            | 10.3010(5)                                                              | 10.3019(13)                                                            | 10.3120(5)                                                             | 10.232(2)                                                              |
| <i>b</i> /Å                                 | 11.8324(14)                                                            | 11.8232(12)                                                            | 11.8039(6)                                                              | 11.8026(16)                                                            | 11.7797(6)                                                             | 12.552(2)                                                              |
| <i>c</i> /Å                                 | 14.4365(18)                                                            | 14.4659(13)                                                            | 14.4529(7)                                                              | 14.448(2)                                                              | 14.4411(8)                                                             | 14.195(3)                                                              |
| $\alpha$ /°                                 | 89.489(7)                                                              | 89.493(5)                                                              | 89.278(2)                                                               | 89.120(4)                                                              | 89.020(3)                                                              | 89.362(5)                                                              |
| $\beta$ /°                                  | 77.986(7)                                                              | 78.117(5)                                                              | 78.052(2)                                                               | 78.070(4)                                                              | 78.107(2)                                                              | 78.082(7)                                                              |
| $\gamma$ /°                                 | 76.638(7)                                                              | 76.854(5)                                                              | 76.709(2)                                                               | 76.718(4)                                                              | 76.588(2)                                                              | 78.575(6)                                                              |
| Volume/Å <sup>3</sup>                       | 1671.7(4)                                                              | 1677.9(3)                                                              | 1672.10(14)                                                             | 1671.8(4)                                                              | 1668.86(15)                                                            | 1747.7(6)                                                              |
| <i>Z</i>                                    | 2                                                                      | 2                                                                      | 2                                                                       | 2                                                                      | 2                                                                      | 2                                                                      |
| $\rho_{\text{calc}}$ /g/cm <sup>3</sup>     | 1.750                                                                  | 1.737                                                                  | 1.755                                                                   | 1.760                                                                  | 1.774                                                                  | 1.728                                                                  |
| $\mu$ /mm <sup>-1</sup>                     | 2.319                                                                  | 2.191                                                                  | 2.450                                                                   | 2.594                                                                  | 2.886                                                                  | 2.221                                                                  |
| <i>F</i> (000)                              | 882.0                                                                  | 880.0                                                                  | 884.0                                                                   | 886.0                                                                  | 890.0                                                                  | 914.0                                                                  |
| 2 $\theta$ range for data collection/°      | 2.886 to 54.482                                                        | 2.88 to 55.92                                                          | 4.488 to 61.092                                                         | 2.882 to 52.904                                                        | 2.884 to 54.524                                                        | 2.934 to 51.482                                                        |
| Reflections collected                       | 22017                                                                  | 33155                                                                  | 81792                                                                   | 26596                                                                  | 24573                                                                  | 18918                                                                  |
| Independent reflections                     | 7453<br>[ $R_{\text{int}} = 0.0449$ ,<br>$R_{\text{sigma}} = 0.0547$ ] | 8027<br>[ $R_{\text{int}} = 0.0568$ ,<br>$R_{\text{sigma}} = 0.0522$ ] | 10251<br>[ $R_{\text{int}} = 0.0371$ ,<br>$R_{\text{sigma}} = 0.0243$ ] | 6854<br>[ $R_{\text{int}} = 0.0688$ ,<br>$R_{\text{sigma}} = 0.0752$ ] | 7430<br>[ $R_{\text{int}} = 0.0390$ ,<br>$R_{\text{sigma}} = 0.0428$ ] | 6551<br>[ $R_{\text{int}} = 0.0604$ ,<br>$R_{\text{sigma}} = 0.0753$ ] |
| Data/restraints/parameters                  | 7453/0/497                                                             | 8027/0/497                                                             | 10251/0/497                                                             | 6854/0/497                                                             | 7430/0/497                                                             | 6551/3/526                                                             |
| Goodness-of-fit on $F^2$                    | 1.024                                                                  | 1.055                                                                  | 1.039                                                                   | 0.998                                                                  | 1.056                                                                  | 1.044                                                                  |
| Final R indexes [ $I \geq 2\sigma(I)$ ]     | $R_1 = 0.0314$ ,<br>$wR_2 = 0.0578$                                    | $R_1 = 0.0332$ ,<br>$wR_2 = 0.0724$                                    | $R_1 = 0.0189$ ,<br>$wR_2 = 0.0391$                                     | $R_1 = 0.0384$ ,<br>$wR_2 = 0.0714$                                    | $R_1 = 0.0270$ ,<br>$wR_2 = 0.0569$                                    | $R_1 = 0.0421$ ,<br>$wR_2 = 0.0880$                                    |
| Final R indexes [all data]                  | $R_1 = 0.0422$ ,<br>$wR_2 = 0.0612$                                    | $R_1 = 0.0451$ ,<br>$wR_2 = 0.0783$                                    | $R_1 = 0.0252$ ,<br>$wR_2 = 0.0406$                                     | $R_1 = 0.0525$ ,<br>$wR_2 = 0.0768$                                    | $R_1 = 0.0322$ ,<br>$wR_2 = 0.0589$                                    | $R_1 = 0.0555$ ,<br>$wR_2 = 0.0936$                                    |
| Largest diff. peak/hole / e Å <sup>-3</sup> | 0.90/-1.02                                                             | 1.44/-1.40                                                             | 0.63/-0.66                                                              | 1.30/-0.97                                                             | 1.15/-0.46                                                             | 0.93/-1.15                                                             |

**Table S2.** SHAPE analysis of the LnIII ion in complexes 1Dy–6Gd.

| Label    | Shape                                     | Symmetry                   | $1_{\text{Gd}}$ | $2_{\text{Dy}}$ | $3_{\text{Gd}}$ | $4_{\text{Dy}}$ | $5_{\text{Gd}}$ | $6_{\text{Dy}}$ |
|----------|-------------------------------------------|----------------------------|-----------------|-----------------|-----------------|-----------------|-----------------|-----------------|
| EP-9     | Enneagon                                  | $D_{9h}$                   | 35.534          | 35.430          | 35.522          | 35.386          | 35.340          | 35.450          |
| OPY-9    | Octagonal pyramid                         | $C_{8v}$                   | 21.385          | 21.325          | 21.453          | 21.502          | 21.582          | 21.500          |
| HBPY-9   | Heptagonal bipyramid                      | $D_{7h}$                   | 16.872          | 16.821          | 16.998          | 17.070          | 17.310          | 16.741          |
| JTC-9    | Johnson triangular cupola J3              | $C_{3v}$                   | 16.891          | 16.915          | 16.805          | 16.741          | 16.563          | 16.524          |
| JCCU-9   | Capped cube J8                            | $C_{4v}$                   | 9.381           | 9.365           | 9.317           | 9.313           | 9.359           | 9.656           |
| CCU-9    | Spherical-relaxed capped cube             | $C_{4v}$                   | 7.964           | 7.940           | 7.916           | 7.924           | 8.024           | 8.265           |
| JCSAPR-9 | Capped square antiprism J10               | $C_{4v}$                   | 2.829           | 2.866           | 2.779           | 2.720           | 2.675           | 3.026           |
| CSAPR-9  | <b>Spherical capped square antiprism</b>  | <b><math>C_{4v}</math></b> | <b>1.826</b>    | <b>1.862</b>    | <b>1.787</b>    | <b>1.733</b>    | <b>1.728</b>    | <b>2.045</b>    |
| JTCTPR-9 | Tricapped trigonal prism J51              | $D_{3h}$                   | 3.388           | 3.434           | 3.305           | 3.222           | 3.107           | 3.473           |
| TCTPR-9  | <b>Spherical tricapped trigonal prism</b> | <b><math>D_{3h}</math></b> | <b>1.611</b>    | <b>1.640</b>    | <b>1.582</b>    | <b>1.540</b>    | <b>1.482</b>    | <b>1.674</b>    |
| JTDIC-9  | Tridiminshed icosahedron J63              | $C_{3v}$                   | 12.333          | 12.253          | 12.382          | 12.492          | 12.355          | 12.463          |
| HH-9     | Hula-hoop                                 | $C_{2v}$                   | 11.122          | 11.114          | 11.036          | 11.007          | 11.068          | 10.707          |
| MFF-9    | Muffin                                    | $C_s$                      | 2.401           | 2.434           | 2.384           | 2.323           | 2.301           | 2.288           |

**Table S3.** Relaxation fitting parameters from the least-square fitting of the Cole-Cole plots of 1 by the single-component generalized Debye model at zero and 1000 Oe dc fields.

| $T$ (K)             | $\chi_s$ (emu/mol) | $\Delta\chi$ (emu/mol) | $\tau$ (s) | $\alpha$ |
|---------------------|--------------------|------------------------|------------|----------|
| At zero dc field    |                    |                        |            |          |
| 1.9                 | 1.2765             | 1.2912                 | 3.36058E-5 | 0.50772  |
| 2.0                 | 1.34491            | 1.17066                | 3.23024E-5 | 0.49355  |
| 2.1                 | 1.39472            | 1.08152                | 3.02308E-5 | 0.48958  |
| 2.3                 | 1.40412            | 1.00986                | 2.27367E-5 | 0.49254  |
| 2.4                 | 1.37441            | 1.00936                | 1.76728E-5 | 0.50116  |
| 2.5                 | 1.30489            | 1.04974                | 1.26607E-5 | 0.51156  |
| 2.6                 | 1.31385            | 1.0114                 | 1.18287E-5 | 0.50683  |
| 2.7                 | 1.23707            | 1.06055                | 8.35194E-6 | 0.51712  |
| 2.8                 | 1.32842            | 0.94162                | 9.49473E-6 | 0.51581  |
| 2.9                 | 1.33295            | 0.90937                | 8.92779E-6 | 0.51627  |
| 3.0                 | 1.10923            | 1.10662                | 4.37123E-6 | 0.53084  |
| 3.1                 | 1.24992            | 0.93833                | 6.06339E-6 | 0.52176  |
| 3.2                 | 1.24895            | 0.91243                | 5.57239E-6 | 0.52585  |
| 3.3                 | 1.15662            | 0.97765                | 3.86798E-6 | 0.53435  |
| At 1000 Oe dc field |                    |                        |            |          |
| 2.48                | 1.87532            | 0.51241                | 0.02755    | 0.3767   |
| 2.67                | 1.87838            | 0.45083                | 0.02054    | 0.3294   |

|      |         |         |          |         |
|------|---------|---------|----------|---------|
| 2.87 | 1.85946 | 0.40558 | 0.01557  | 0.29451 |
| 3.06 | 1.83165 | 0.37184 | 0.0117   | 0.26242 |
| 3.25 | 1.77594 | 0.37842 | 0.00767  | 0.30287 |
| 3.45 | 1.74646 | 0.34854 | 0.00582  | 0.26455 |
| 3.64 | 1.70957 | 0.32687 | 0.00429  | 0.23461 |
| 3.83 | 1.67147 | 0.30906 | 0.00312  | 0.21055 |
| 4.03 | 1.60975 | 0.32017 | 0.00193  | 0.24595 |
| 4.22 | 1.55222 | 0.32798 | 0.00124  | 0.26535 |
| 4.41 | 1.49067 | 0.34433 | 7.81E-04 | 0.29603 |
| 4.6  | 1.43633 | 0.35086 | 5.07E-04 | 0.30775 |
| 4.8  | 1.40129 | 0.33997 | 3.75E-04 | 0.29674 |
| 5    | 1.34901 | 0.3462  | 2.44E-04 | 0.30521 |
| 5.5  | 1.2473  | 0.34194 | 1.05E-04 | 0.32655 |
| 6    | 1.14808 | 0.3463  | 4.44E-05 | 0.36909 |
| 6.5  | 1.10299 | 0.30916 | 2.77E-05 | 0.39751 |
| 7    | 1.04637 | 0.29105 | 1.58E-05 | 0.43792 |
| 7.5  | 0.96222 | 0.30746 | 7.01E-06 | 0.4815  |

**Table S4.** Relaxation fitting parameters from the least-square fitting of the Cole-Cole plots of 6 by the single-component generalized Debye model at zero and 1000 Oe dc fields.

| $T$ (K)          | $\chi_s$ (emu/mol) | $\Delta\chi$ (emu/mol) | $\tau$ (s) | $\alpha$ |
|------------------|--------------------|------------------------|------------|----------|
| At zero dc field |                    |                        |            |          |
| 2                | 0.55707            | 5.40728                | 9.72E-04   | 0.13261  |
| 3                | 0.40594            | 3.60678                | 8.45E-04   | 0.12275  |
| 4                | 0.3058             | 2.7042                 | 7.19E-04   | 0.14111  |
| 5                | 0.25359            | 2.1594                 | 6.17E-04   | 0.14402  |
| 6                | 0.22139            | 1.79701                | 5.46E-04   | 0.14637  |
| 7                | 0.19301            | 1.54043                | 4.80E-04   | 0.14398  |
| 8                | 0.17006            | 1.35336                | 4.29E-04   | 0.1451   |
| 9                | 0.15992            | 1.19125                | 3.82E-04   | 0.13094  |
| 10               | 0.15399            | 1.06466                | 3.42E-04   | 0.11373  |
| 11               | 0.14875            | 0.96763                | 3.03E-04   | 0.09513  |
| 12               | 0.12957            | 0.87889                | 2.50E-04   | 0.08003  |
| 13               | 0.12344            | 0.8173                 | 2.12E-04   | 0.06197  |
| 14               | 0.11144            | 0.76341                | 1.74E-04   | 0.04442  |
| 15               | 0.0813             | 0.73604                | 1.32E-04   | 0.04176  |
| 16               | 0.10111            | 0.66205                | 1.09E-04   | 0.00627  |
| 17               | 0.08076            | 0.64222                | 8.10E-05   | 0.01017  |
| 18               | 0.03004            | 0.65334                | 5.50E-05   | 0.0215   |

| At 1000 Oe dc field |         |         |          |         |
|---------------------|---------|---------|----------|---------|
| 4.5                 | 0.19201 | 2.94582 | 9.73E-01 | 0.25208 |
| 5                   | 0.19025 | 2.39121 | 4.30E-01 | 0.18598 |
| 5.5                 | 0.17978 | 2.09776 | 2.26E-01 | 0.14655 |
| 6                   | 0.1704  | 1.88585 | 1.29E-01 | 0.11539 |
| 6.5                 | 0.16181 | 1.71302 | 8.00E-02 | 0.0974  |
| 7                   | 0.14968 | 1.58872 | 5.02E-02 | 0.08581 |
| 7.5                 | 0.14091 | 1.48538 | 3.30E-02 | 0.08325 |
| 8                   | 0.13638 | 1.38495 | 2.20E-02 | 0.05784 |
| 8.5                 | 0.12852 | 1.31006 | 1.51E-02 | 0.05766 |
| 9                   | 0.12022 | 1.23324 | 1.06E-02 | 0.05549 |
| 9.5                 | 0.11423 | 1.17551 | 7.53E-03 | 0.05318 |
| 10                  | 0.11075 | 1.10472 | 5.39E-03 | 0.04325 |
| 10.5                | 0.10419 | 1.05137 | 3.94E-03 | 0.04155 |
| 11                  | 0.09944 | 1.01086 | 2.95E-03 | 0.04295 |
| 11.5                | 0.09366 | 0.97521 | 2.24E-03 | 0.04683 |
| 12                  | 0.09098 | 0.91775 | 1.62E-03 | 0.03647 |
| 12.5                | 0.08778 | 0.88173 | 1.25E-03 | 0.03488 |
| 13                  | 0.08523 | 0.85006 | 9.74E-04 | 0.03323 |
| 13.5                | 0.08273 | 0.81985 | 7.61E-04 | 0.03359 |
| 14                  | 0.07801 | 0.79149 | 5.95E-04 | 0.03219 |
| 14.5                | 0.07263 | 0.76724 | 4.66E-04 | 0.03322 |
| 15                  | 0.07377 | 0.73838 | 3.72E-04 | 0.02785 |
| 15.5                | 0.06898 | 0.71946 | 2.94E-04 | 0.02896 |
| 16                  | 0.06505 | 0.69885 | 2.34E-04 | 0.02896 |
| 16.5                | 0.06659 | 0.67435 | 1.88E-04 | 0.02497 |
| 17                  | 0.05852 | 0.66112 | 1.50E-04 | 0.02613 |
| 17.5                | 0.05998 | 0.63789 | 1.22E-04 | 0.01504 |
| 18                  | 0.05784 | 0.62257 | 9.81E-05 | 0.02023 |
| 18.5                | 0.03747 | 0.62583 | 7.62E-05 | 0.0273  |
| 19                  | 0.04774 | 0.59796 | 6.34E-05 | 0.02296 |
| 19.5                | 0.04154 | 0.58691 | 5.13E-05 | 0.0215  |
| 20                  | 0.03426 | 0.57943 | 4.19E-05 | 0.02011 |
| 21                  | 0.03723 | 0.54799 | 2.84E-05 | 0.02124 |
| 22                  | 0.04208 | 0.51715 | 1.97E-05 | 0.02293 |



**Table S5.** Relaxation fitting parameters from the least-square fitting of the Cole-Cole plots of 2 by the single-component generalized Debye model at 1000 Oe dc fields.

| $T$ (K)           | $\chi_s$ (emu/mol) | $\Delta\chi$ (emu/mol) | $\tau$ (s) | $\alpha$ |
|-------------------|--------------------|------------------------|------------|----------|
| At 1 kOe dc field |                    |                        |            |          |
| 2.29              | 0.80486            | 2.8741                 | 3.78E-04   | 0.37463  |
| 2.48              | 0.7892             | 2.68681                | 3.32E-04   | 0.33877  |
| 2.67              | 0.7762             | 2.5351                 | 3.01E-04   | 0.30619  |
| 2.87              | 0.76179            | 2.40255                | 2.77E-04   | 0.27907  |
| 3.06              | 0.72814            | 2.3143                 | 2.54E-04   | 0.26625  |
| 3.25              | 0.72719            | 2.18093                | 2.37E-04   | 0.24154  |
| 3.45              | 0.715              | 2.06778                | 2.19E-04   | 0.22258  |
| 3.64              | 0.68092            | 1.99489                | 2.01E-04   | 0.21793  |
| 3.83              | 0.68159            | 1.87794                | 1.88E-04   | 0.20118  |
| 4.03              | 0.68226            | 1.76665                | 1.76E-04   | 0.18343  |
| 4.22              | 0.66858            | 1.68086                | 1.63E-04   | 0.17294  |
| 4.41              | 0.65607            | 1.60462                | 1.51E-04   | 0.1663   |
| 4.61              | 0.64683            | 1.52737                | 1.40E-04   | 0.15661  |
| 4.8               | 0.63788            | 1.45587                | 1.30E-04   | 0.14872  |
| 5                 | 0.62454            | 1.39054                | 1.19E-04   | 0.14048  |
| 5.5               | 0.59796            | 1.24289                | 9.55E-05   | 0.12961  |
| 6                 | 0.58552            | 1.10735                | 7.93E-05   | 0.12115  |
| 6.5               | 0.65536            | 0.92405                | 7.99E-05   | 0.0957   |
| 7                 | 0.63557            | 0.83623                | 7.05E-05   | 0.09089  |
| 7.5               | 0.62614            | 0.7508                 | 6.45E-05   | 0.07964  |
| 8                 | 0.5939             | 0.69873                | 5.58E-05   | 0.07133  |
| 8.5               | 0.55413            | 0.66464                | 4.60E-05   | 0.06482  |
| 9                 | 0.49993            | 0.65331                | 3.44E-05   | 0.06494  |
| 9.5               | 0.40465            | 0.68789                | 2.24E-05   | 0.06781  |

**Table S6.** Relaxation fitting parameters from the least-square fitting of the Cole-Cole plots of 4 by the single-component generalized Debye model at 1000 Oe dc fields.

| $T$ (K)           | $\chi_s$ (emu/mol) | $\Delta\chi$ (emu/mol) | $\tau$ (s) | $\alpha$ |
|-------------------|--------------------|------------------------|------------|----------|
| At 1 kOe dc field |                    |                        |            |          |
| 1.9               | 0.31848            | 2.68397                | 2.32E-03   | 0.25636  |
| 2.1               | 0.28659            | 2.3756                 | 1.53E-03   | 0.26767  |
| 2.29              | 0.26752            | 2.21421                | 1.11E-03   | 0.27633  |
| 2.48              | 0.26272            | 2.0556                 | 8.03E-04   | 0.27485  |
| 2.67              | 0.2704             | 1.90743                | 6.06E-04   | 0.26608  |
| 2.87              | 0.28531            | 1.76499                | 4.71E-04   | 0.25039  |
| 3.06              | 0.31042            | 1.62606                | 3.77E-04   | 0.22903  |
| 3.25              | 0.32688            | 1.5081                 | 3.04E-04   | 0.20579  |
| 3.45              | 0.34897            | 1.39262                | 2.47E-04   | 0.17746  |
| 3.64              | 0.3656             | 1.28907                | 1.99E-04   | 0.14746  |
| 3.83              | 0.36952            | 1.20879                | 1.57E-04   | 0.12481  |
| 4.03              | 0.35272            | 1.15895                | 1.20E-04   | 0.11487  |
| 4.22              | 0.33741            | 1.11147                | 9.29E-05   | 0.10186  |
| 4.41              | 0.32559            | 1.06597                | 7.13E-05   | 0.09384  |
| 4.61              | 0.31287            | 1.02705                | 5.53E-05   | 0.08789  |
| 4.8               | 0.30015            | 0.99207                | 4.26E-05   | 0.08666  |
| 5                 | 0.26802            | 0.97857                | 3.12E-05   | 0.0922   |
| 5.5               | 0.37823            | 0.76513                | 1.93E-05   | 0.08379  |

**Table S7.** Relaxation fitting parameters from the least-square fitting of the Cole-Cole plots of 5 by the single-component generalized Debye model at 1000 Oe dc fields.

| $T$ (K)           | $\chi_s$ (emu/mol) | $\Delta\chi$ (emu/mol) | $\tau$ (s) | $\alpha$ |
|-------------------|--------------------|------------------------|------------|----------|
| At 1 kOe dc field |                    |                        |            |          |
| 1.9               | 0.05412            | 0.61804                | 1.14E-03   | 0.1604   |
| 2                 | 0.05468            | 0.57936                | 1.01E-03   | 0.14998  |
| 2.1               | 0.05061            | 0.55568                | 9.02E-04   | 0.15357  |
| 2.4               | 0.04091            | 0.49509                | 6.65E-04   | 0.15014  |
| 2.6               | 0.04088            | 0.45462                | 5.58E-04   | 0.13852  |
| 2.8               | 0.03536            | 0.42639                | 4.68E-04   | 0.13627  |
| 3                 | 0.03563            | 0.39597                | 4.01E-04   | 0.12501  |
| 3.2               | 0.0308             | 0.37657                | 3.40E-04   | 0.12467  |
| 3.4               | 0.03292            | 0.35097                | 2.99E-04   | 0.10998  |
| 3.6               | 0.02646            | 0.33692                | 2.51E-04   | 0.11149  |
| 3.8               | 0.02867            | 0.31503                | 2.21E-04   | 0.09576  |
| 4                 | 0.0268             | 0.30021                | 1.88E-04   | 0.09477  |
| 4.2               | 0.03346            | 0.27765                | 1.68E-04   | 0.07698  |
| 4.4               | 0.02136            | 0.27628                | 1.38E-04   | 0.08242  |
| 4.6               | 0.02122            | 0.263                  | 1.20E-04   | 0.07285  |
| 4.8               | 0.02673            | 0.24608                | 1.07E-04   | 0.06072  |
| 5                 | 0.02904            | 0.23255                | 9.48E-05   | 0.04531  |
| 5.5               | 0.01971            | 0.21796                | 6.40E-05   | 0.02558  |
| 6                 | 0.01 (Fixed)       | 0.20827                | 4.30E-05   | 0.01708  |

**Table S8.** The splitting of the lowest multiplets for Ln<sup>III</sup> ions in **1-6** compounds calculated by CASSCF method

| Compound                                                  | 1      | 2      | 3      | 4      | 5      | 6      |
|-----------------------------------------------------------|--------|--------|--------|--------|--------|--------|
| Ln                                                        | Dy     | Tb     | Ho     | Er     | Yb     | Dy     |
| Energy levels<br>(cm <sup>-1</sup> )                      | 0      | 0      | 0      | 0      | 0      | 0      |
|                                                           | 0      | 0.07   | 1.16   | 0      | 0      | 0      |
|                                                           | 160.78 | 114.26 | 136.77 | 57.34  | 277.26 | 155.22 |
|                                                           | 160.78 | 115.42 | 153.08 | 57.34  | 277.26 | 155.22 |
|                                                           | 305.67 | 201.91 | 172.74 | 116.8  | 460.12 | 308.09 |
|                                                           | 305.67 | 206.96 | 188.43 | 116.8  | 460.12 | 308.09 |
|                                                           | 362.81 | 320.16 | 220.63 | 162.67 | 658.68 | 366.08 |
|                                                           | 362.81 | 330.79 | 240.28 | 162.67 | 658.68 | 366.08 |
|                                                           | 467.97 | 421.59 | 252.46 | 205.5  |        | 461.29 |
|                                                           | 467.97 | 483.36 | 281.23 | 205.5  |        | 461.29 |
|                                                           | 500    | 524.71 | 301.21 | 262.98 |        | 524.81 |
|                                                           | 500    | 647.76 | 322.81 | 262.98 |        | 524.81 |
|                                                           | 566.61 | 656.54 | 353.22 | 304.43 |        | 557.12 |
|                                                           | 566.61 |        | 372.73 | 304.43 |        | 557.12 |
|                                                           | 639.45 |        | 392.21 | 467.57 |        | 631.23 |
|                                                           | 639.45 |        | 431.14 | 467.57 |        | 631.23 |
|                                                           |        | 437.27 |        |        |        |        |
| Calculated spin-orbit interactions<br>(cm <sup>-1</sup> ) | 1928   | 1732   | 2142   | 2372   | 2880   | 1928   |

**Table S9.** The g-factors for the effective spin 1/2 calculated by CASSCF for lowest Kramers (pseudo)doublets of **1-6**.

|                                             |                      |                      |                      |
|---------------------------------------------|----------------------|----------------------|----------------------|
| complex 1 (Dy <sup>III</sup> )              |                      |                      |                      |
| <i>E</i> (cm <sup>-1</sup> )                | <i>g<sub>x</sub></i> | <i>g<sub>y</sub></i> | <i>g<sub>z</sub></i> |
| 0                                           | 0.008730             | 0.010438             | 19.785687            |
| 161                                         | 0.104307             | 0.129858             | 17.107310            |
| 306                                         | 2.678054             | 6.545777             | 10.780921            |
| complex 2 (Tb <sup>III</sup> ) <sup>a</sup> |                      |                      |                      |
| <i>E</i> (cm <sup>-1</sup> )                | <i>g<sub>x</sub></i> | <i>g<sub>y</sub></i> | <i>g<sub>z</sub></i> |
| 0.0360707                                   | 0.0                  | 0.0                  | 17.826389            |
| 114.8369735                                 | 0.0                  | 0.0                  | 15.282851            |
| 204.4346824                                 | 0.0                  | 0.0                  | 11.747221            |
| complex 3 (Ho <sup>III</sup> ) <sup>a</sup> |                      |                      |                      |
| <i>E</i> (cm <sup>-1</sup> )                | <i>g<sub>x</sub></i> | <i>g<sub>y</sub></i> | <i>g<sub>z</sub></i> |
| 0.57919                                     | 0.0                  | 0.0                  | 18.949454            |
| complex 4 (Er <sup>III</sup> )              |                      |                      |                      |
| <i>E</i> (cm <sup>-1</sup> )                | <i>g<sub>x</sub></i> | <i>g<sub>y</sub></i> | <i>g<sub>z</sub></i> |
| 0                                           | 0.886047             | 2.602348             | 14.051874            |
| 57                                          | 3.674964             | 4.638638             | 7.799773             |
| 117                                         | 1.862991             | 2.756479             | 8.899551             |
| complex 5 (Yb <sup>III</sup> )              |                      |                      |                      |
| <i>E</i> (cm <sup>-1</sup> )                | <i>g<sub>x</sub></i> | <i>g<sub>y</sub></i> | <i>g<sub>z</sub></i> |
| 0                                           | 0.933863             | 2.183350             | 6.616699             |
| 277                                         | 1.377984             | 2.853956             | 3.243385             |
| 460                                         | 0.424653             | 1.025765             | 5.951962             |
| complex 6 (Dy <sup>III</sup> )              |                      |                      |                      |
| <i>E</i> (cm <sup>-1</sup> )                | <i>g<sub>x</sub></i> | <i>g<sub>y</sub></i> | <i>g<sub>z</sub></i> |
| 0                                           | 0.007161             | 0.007706             | 19.789033            |
| 155                                         | 0.100681             | 0.118645             | 17.095825            |
| 308                                         | 2.517330             | 5.002615             | 11.919597            |

<sup>a</sup> energy values correspond to the average values of two respective levels.

**Table S10.** Comparison of  $U_{\text{eff}}$  value of this work with the other reported mononuclear Yb<sup>III</sup> SMMs.<sup>a</sup>

| Compound                                                                                                     | Field (Oe) | $U_{\text{eff}}$ (K) | $\tau_0$ (s)          | Ref.      |
|--------------------------------------------------------------------------------------------------------------|------------|----------------------|-----------------------|-----------|
| Yb(trensal)                                                                                                  | 2000       | 54.7                 | $1.5 \times 10^{-8}$  | S1        |
| [Yb(L <sup>3</sup> ) <sub>2</sub> (TMH)(CH <sub>3</sub> OH)]                                                 | 1000       | 29.7                 | $3.5 \times 10^{-7}$  | S2        |
| [Yb(tta)(CH <sub>3</sub> OH)]                                                                                | 1000       | 30.3                 | $2.0 \times 10^{-7}$  | S2        |
| [Yb(H <sub>3</sub> Bmshp)(DMF) <sub>2</sub> Cl <sub>2</sub> ].H <sub>4</sub> Bmshp                           | 600        | 38.3                 | $7.16 \times 10^{-7}$ | S3        |
| [Yb(PyrCOO)(acac) <sub>2</sub> (H <sub>2</sub> O) <sub>2</sub> ]                                             | 1000       | 54                   | $7.4 \times 10^{-8}$  | S4        |
| [Ln(NAS) <sub>2</sub> (H <sub>2</sub> O) <sub>6</sub> ](NAS).3H <sub>2</sub> O                               | 1000       | 45                   | $5.1 \times 10^{-8}$  | S5        |
| [Yb(depma) <sub>2</sub> (H <sub>2</sub> O) <sub>6</sub> ]Cl <sub>2</sub> .3H <sub>2</sub> OCH <sub>3</sub> O | 750        | 28.9                 | $4.6 \times 10^{-8}$  | S6        |
| [Yb(H <sub>2</sub> O) <sub>6</sub> (NCS) <sub>3</sub> ].H <sub>2</sub> O                                     | 2500       | 50                   | $2.3 \times 10^{-8}$  | S7        |
| [Yb(H <sub>2</sub> O) <sub>6</sub> (bpy) <sub>2</sub> (NCS) <sub>3</sub> ].0.5(bpy).H <sub>2</sub> O         | 1000       | 47                   | $1.7 \times 10^{-8}$  | S7        |
| [Hbpy][Yb(bpy) <sub>2</sub> (NCS) <sub>4</sub> ].H <sub>2</sub> O                                            | 1000       | 44                   | $2.9 \times 10^{-8}$  | S7        |
| [Hphen][Yb(phen) <sub>2</sub> (NCS) <sub>4</sub> ]                                                           | 1000       | 37                   | $8.4 \times 10^{-8}$  | S7        |
| [Yb(Ph <sub>3</sub> PO) <sub>4</sub> (OTf) <sub>2</sub> ][OTf]                                               | 2000       | 28.2 (SR)            | $2.88 \times 10^{-8}$ | S8        |
|                                                                                                              | 2000       | 27.0 (FR)            | $3.0 \times 10^{-7}$  |           |
| <b>5</b>                                                                                                     | 1000       | 39                   | $1.4 \times 10^{-7}$  | This work |

<sup>a</sup>  $U_{\text{eff}}$  values 25 K onwards are assembled in the table; trensal = 2,2',2''-tris(salicylideneimino)triethylamine; HL<sup>3</sup> = 2-(tetrazol-5-yl)-1,10-phenanthroline; TMH = 2,2,6,6-tetramethylheptanoate; tta = 2-thenoyltrifluoroacetate; H<sub>4</sub>Bmshp = (2,6-bis[(3-methoxysalicylidene)hydrazinecarbonyl]-pyridine); PyrCOOH = pyrazine-2-carboxylic acid; acac = acetylacetonate; NAS = 2-naphthalenesulfonate; depma = 9-diethylphosphono-methylanthracene; bpy = 2,2'-bipyridine; phen = 1,10-phenanthroline; Ph<sub>3</sub>PO = Triphenylphosphine oxide; OTf = Trifluoromethanesulfonate.

**Table S11.** Comparison of  $U_{\text{eff}}$  value of this work with the other reported Dy<sup>III</sup> SMMs with N-salicylideneaniline type ligands in the zwitterionic form.<sup>a</sup>

| Compound                                                                                 | Field (Oe) | $U_{\text{eff}}$ (K) | $\tau_0$ (s)                                   | Ref.      |
|------------------------------------------------------------------------------------------|------------|----------------------|------------------------------------------------|-----------|
| [Dy(HL <sup>4</sup> ) <sub>2</sub> (NO <sub>3</sub> ) <sub>3</sub> ]                     | 2000       | 22.8                 | $4.2 \times 10^{-7}$                           | 39        |
| [Dy(HL <sup>4</sup> ) <sub>2</sub> (NO <sub>3</sub> ) <sub>3</sub> ]                     | 2000       | 22.7<br>22.5         | $2.47 \times 10^{-6}$<br>$3.6 \times 10^{-7}$  | 40        |
| [Dy(NO <sub>3</sub> ) <sub>3</sub> (5BrsalanH) <sub>2</sub> (H <sub>2</sub> O)]·MeCN     | 1000       | 38.5                 | $2.5 \times 10^{-6}$                           | 41        |
| [Dy(NO <sub>3</sub> ) <sub>3</sub> (salanH) <sub>2</sub> (H <sub>2</sub> O)]·MeCN        | 1000       | 18.7                 | $4.5 \times 10^{-7}$                           | 42        |
| [Dy(NO <sub>3</sub> ) <sub>3</sub> (salanH) <sub>2</sub> (MeOH)]·(salanH)                | 1000       | 44.3                 | $2.5 \times 10^{-7}$                           | 42        |
| [Dy(HL <sup>5</sup> ) <sub>2</sub> (NO <sub>3</sub> ) <sub>3</sub> (CH <sub>3</sub> OH)] | 0<br>1000  | 62<br>66.6           | $1.0 \times 10^{-7}$<br>$9.0 \times 10^{-8}$   | 43        |
| [Dy(HL <sup>6</sup> ) <sub>2</sub> (NO <sub>3</sub> ) <sub>3</sub> (CH <sub>3</sub> OH)] | 1000       | 67                   | $9.72 \times 10^{-8}$                          | 44        |
| [Dy(HL <sup>7</sup> ) <sub>2</sub> (NO <sub>3</sub> ) <sub>3</sub> (H <sub>2</sub> O)]   | 0<br>1000  | 43<br>116            | $1.2 \times 10^{-7}$<br>$8.72 \times 10^{-11}$ | 44        |
| [Dy(HL <sup>8</sup> ) <sub>3</sub> (NO <sub>3</sub> ) <sub>3</sub> ]·CH <sub>3</sub> CN  | 1000       | 66                   | $1.29 \times 10^{-7}$                          | 44        |
| [Dy(HL <sup>9</sup> ) <sub>3</sub> (NO <sub>3</sub> ) <sub>3</sub> ]                     | 1000       | 62                   | $6.11 \times 10^{-10}$                         | 44        |
| <b>1</b>                                                                                 | 0<br>1000  | 20.7<br>52.8         | $6.7 \cdot 10^{-9}$<br>$7.6 \cdot 10^{-9}$     | This work |
| <b>6</b>                                                                                 | 0<br>1000  | 151<br>221           | $2.0 \cdot 10^{-8}$<br>$1.9 \cdot 10^{-9}$     | This work |

<sup>a</sup> HL<sup>3</sup> = 2-methoxy-6-[(E)-phenyliminomethyl]phenol; 5BrsalanH = *N*-(5-bromosalicylidene)aniline; salanH = 2-(phenyliminomethyl)phenol; HL<sup>4</sup> = 1-[*N*-(4-bromophenyl)]aminomethylidene]-2(1*H*)naphthalenone; HL<sup>5</sup> = 1-[*N*-(4-chlorophenyl)]aminomethylidene-2(1*H*)naphthalenone; HL<sup>6</sup> = (1-[*N*-(4-nitrophenyl)]aminomethylidene)-2(1*H*)-naphthalenone; HL<sup>7</sup> = (1-[*N*-(4-methoxyphenyl)]aminomethylidene)-2(1*H*)-naphthalenone; HL<sup>8</sup> = (1-[*N*-(4-iodophenyl)]aminomethylidene)-2(1*H*)-naphthalenone;

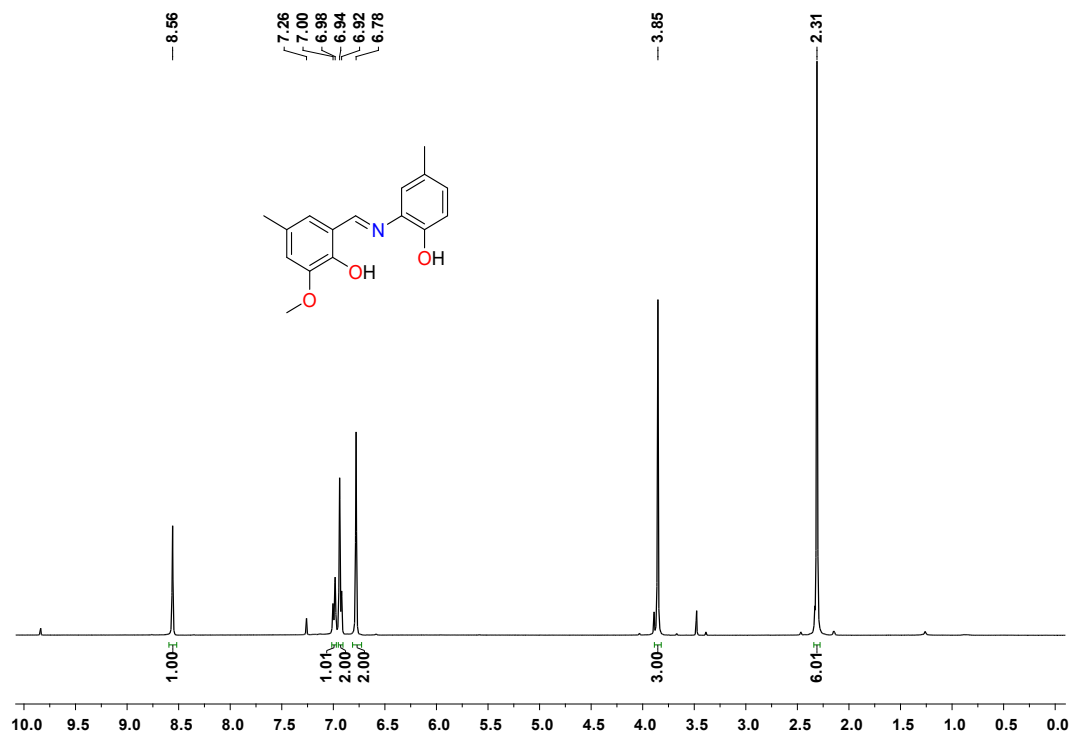

Fig. S1. <sup>1</sup>H NMR spectrum of ligand LH in CDCl<sub>3</sub> at r.t.

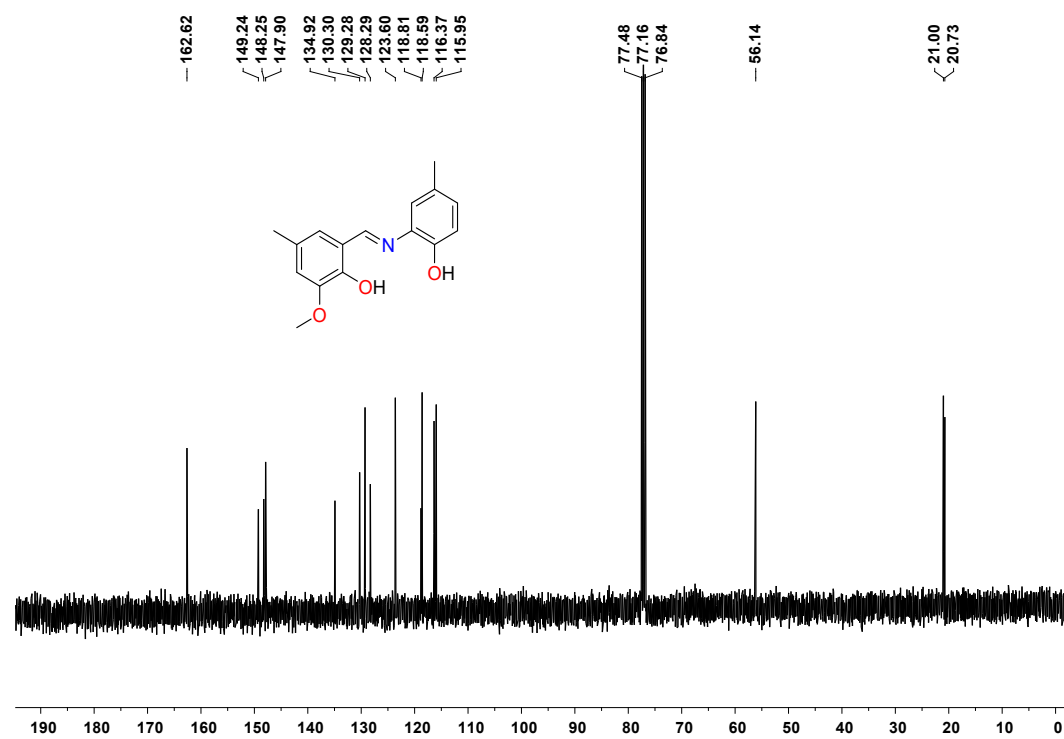

Fig. S2. <sup>13</sup>C NMR of ligand LH in CDCl<sub>3</sub> at r.t.



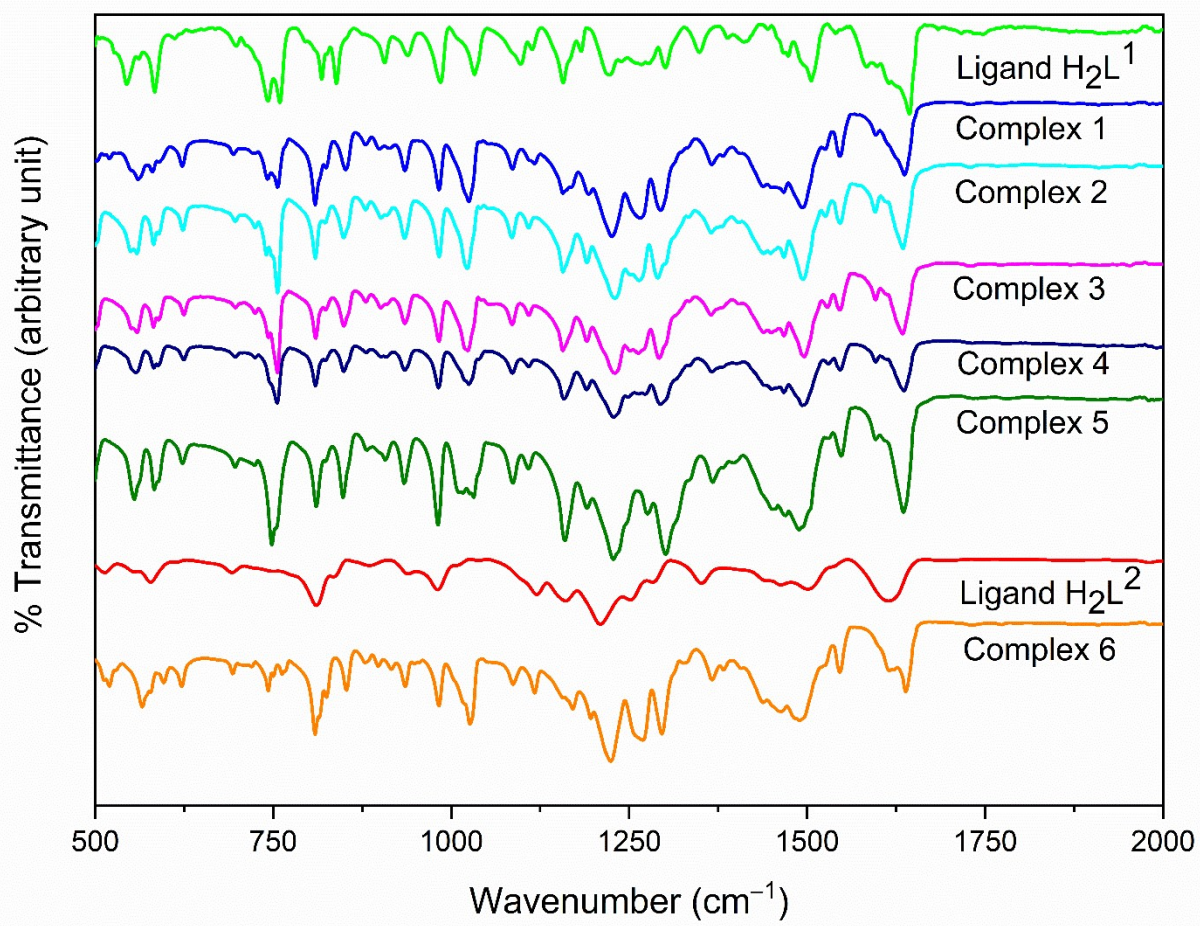

**Fig. S3.** IR spectra of the ligands and complexes 1-6.

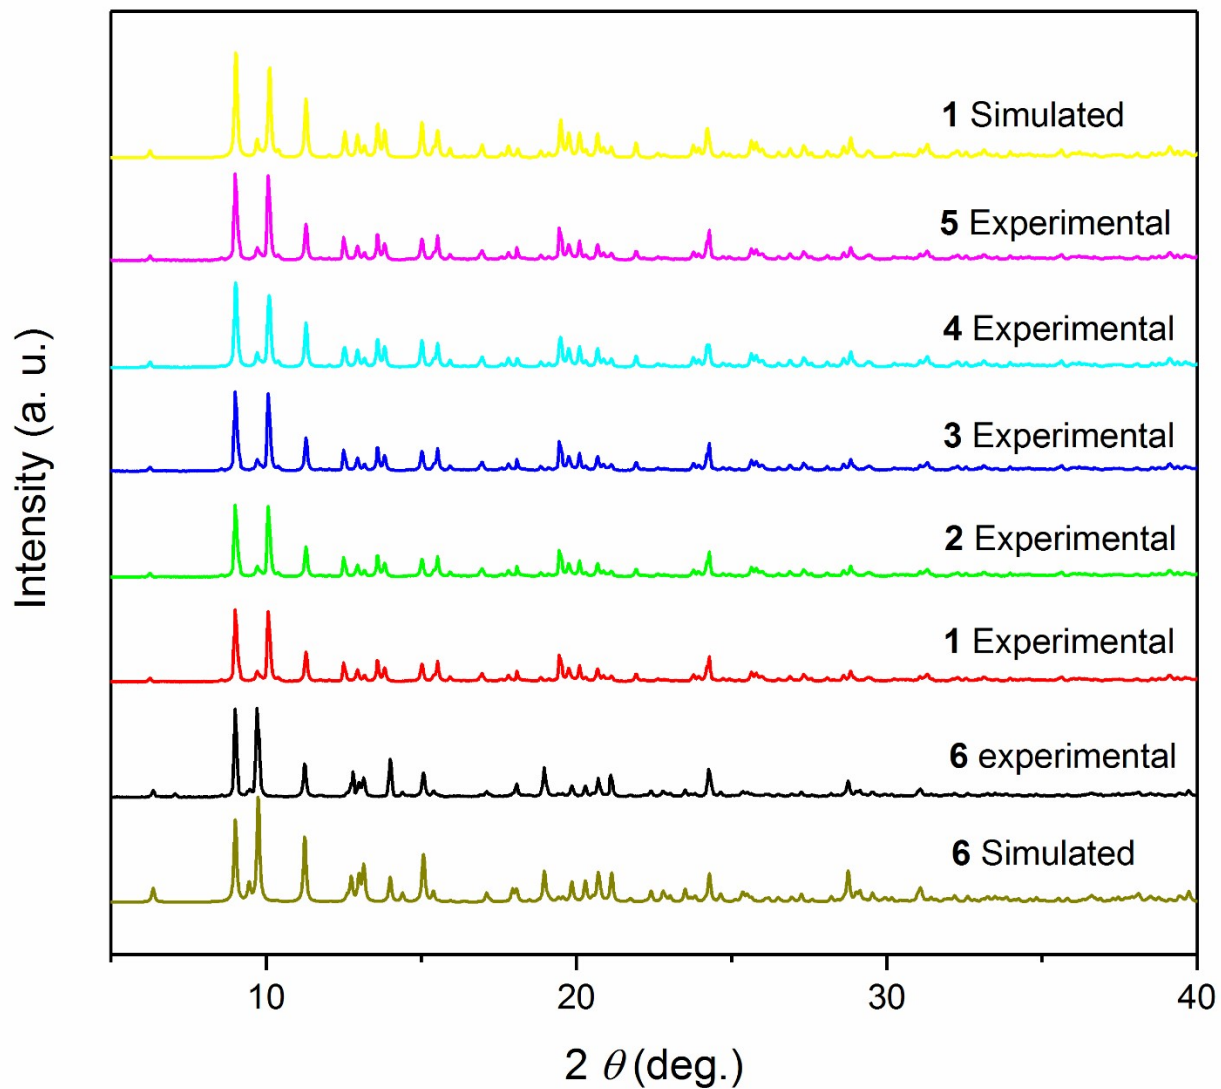

**Fig. S4.** Experimental and simulated PXRD patterns of complexes 1-6.

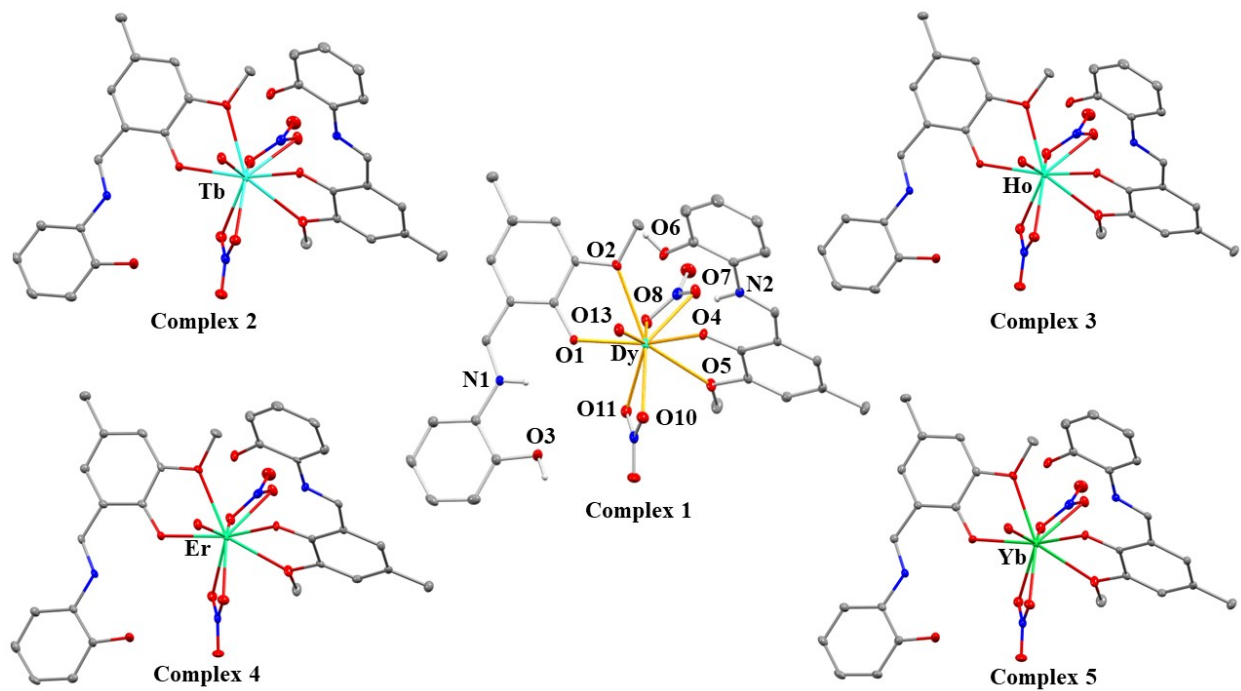

**Fig. S5.** Crystal structures of complexes 1-5 with ellipsoid plots (probability level 30 %)

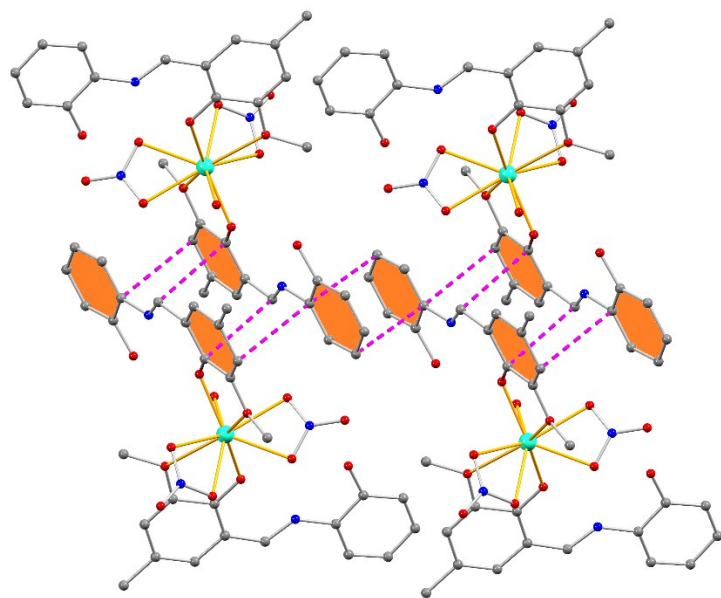

**Fig. S6:** Crystal packing of complex 1 focusing on the  $\pi \cdots \pi$  stacking interaction

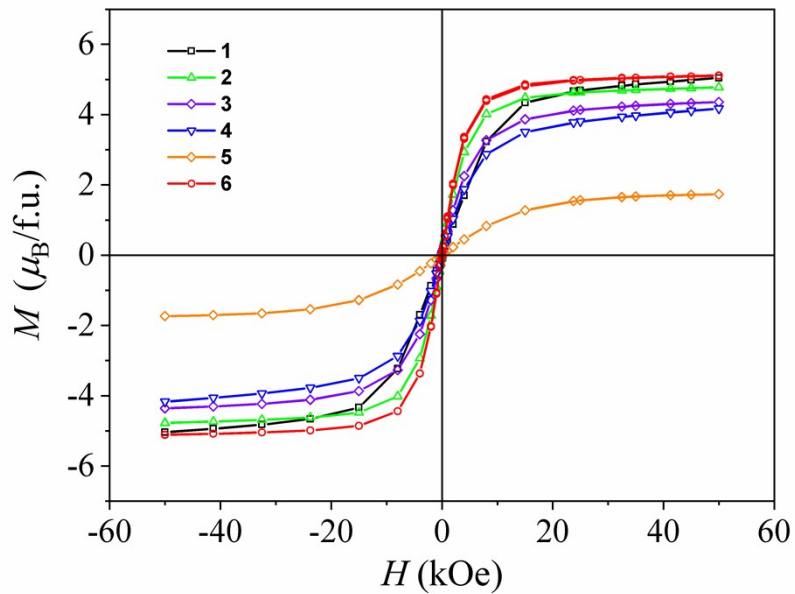

**Fig. S7.** Isothermal magnetization curves for complexes **1-6** at 2 K.

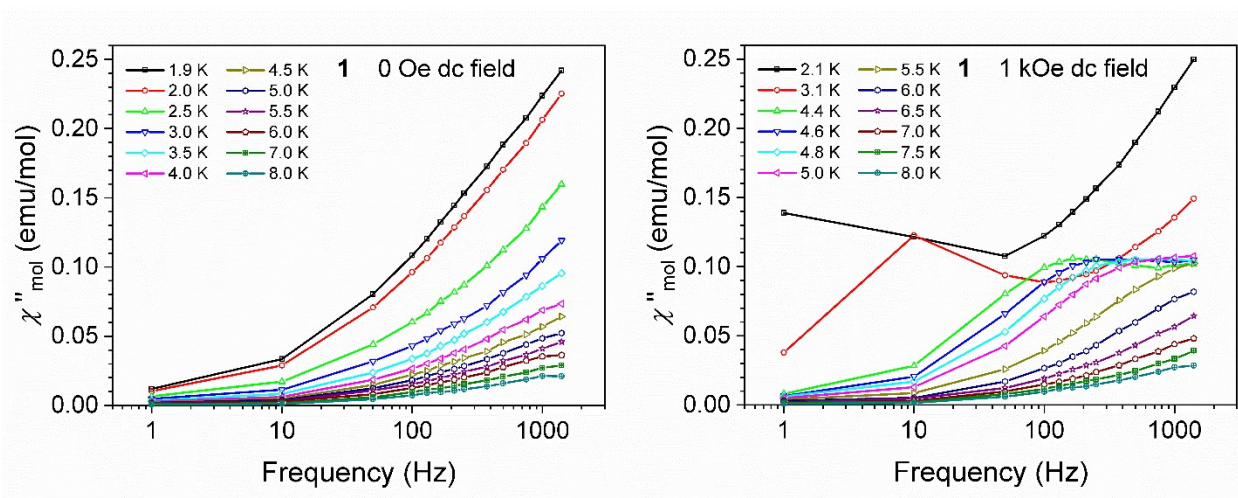

**Fig. S8.** Frequency dependent out-of-phase ac susceptibility plots of **1** in zero dc field (left) and 1 kOe dc field (right).

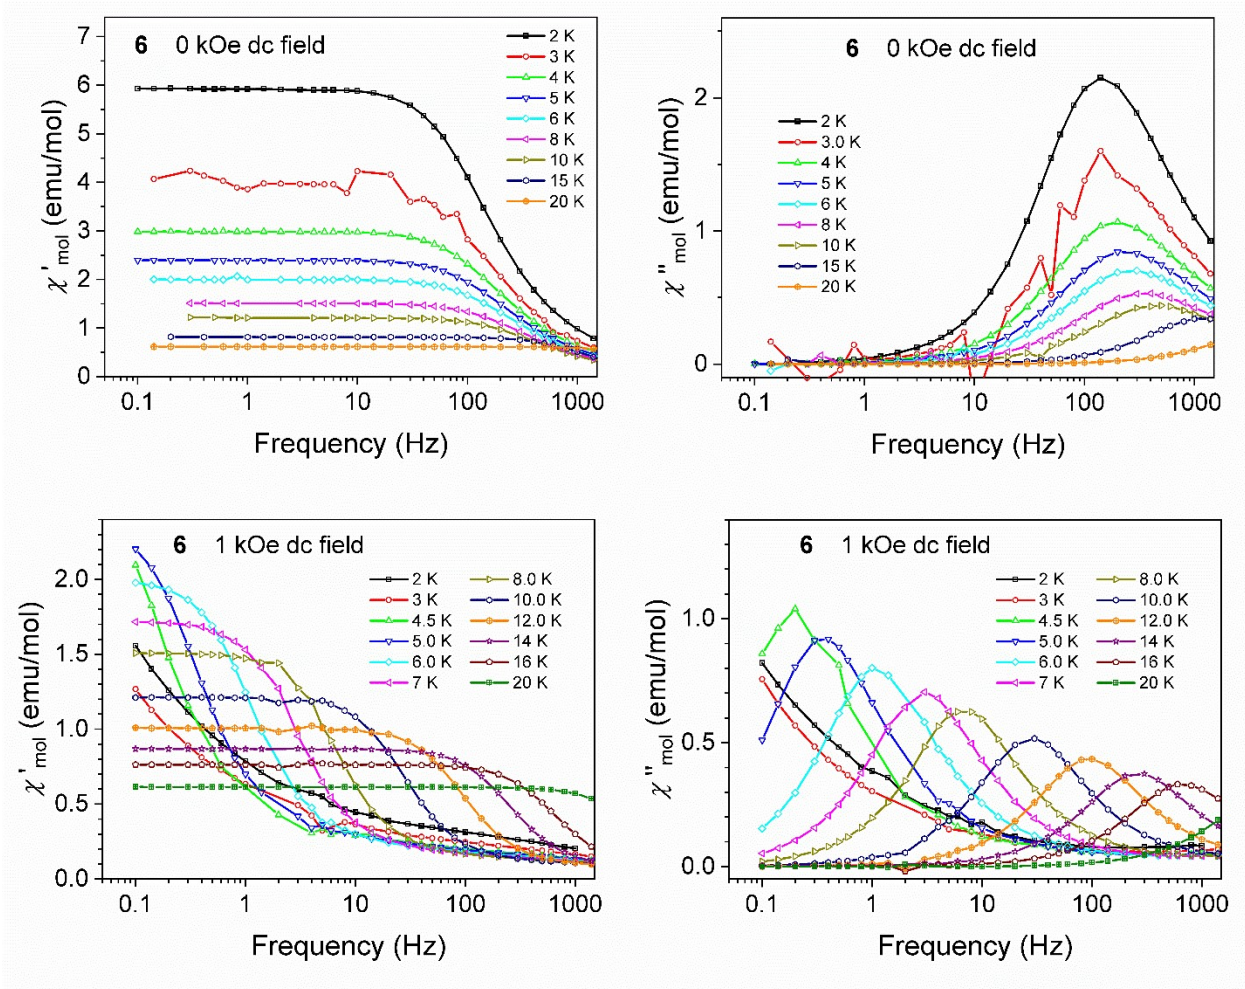

**Fig. S9.** Frequency dependent in-phase and out-of-phase ac susceptibility plots of **6** at indicated dc field.

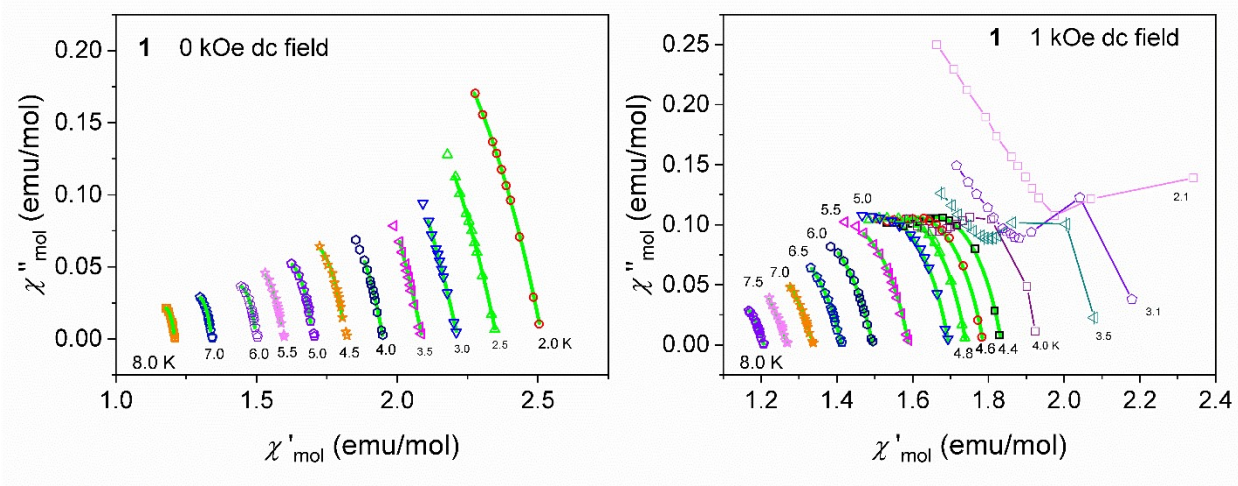

**Fig. S10.** Cole-Cole plot for **1** at zero dc field (left) and 1 kOe dc field (right)

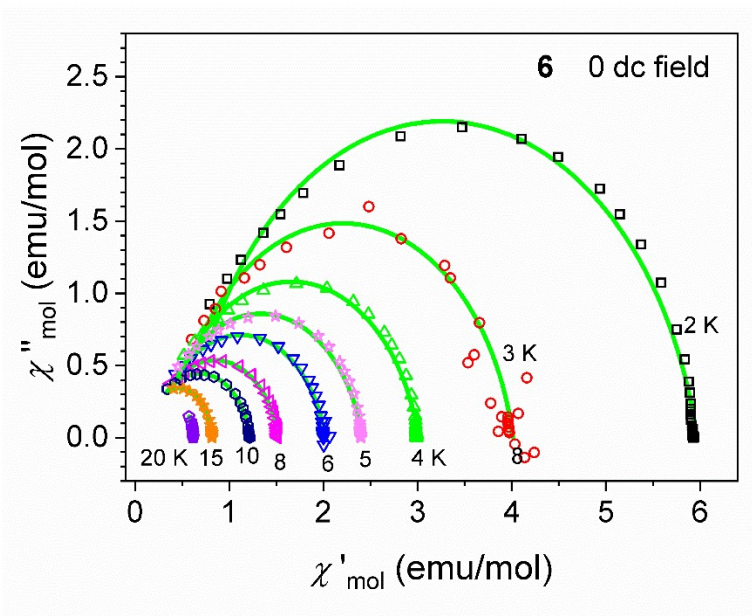

**Fig. S11.** Cole-Cole plot for **6** at zero dc field.

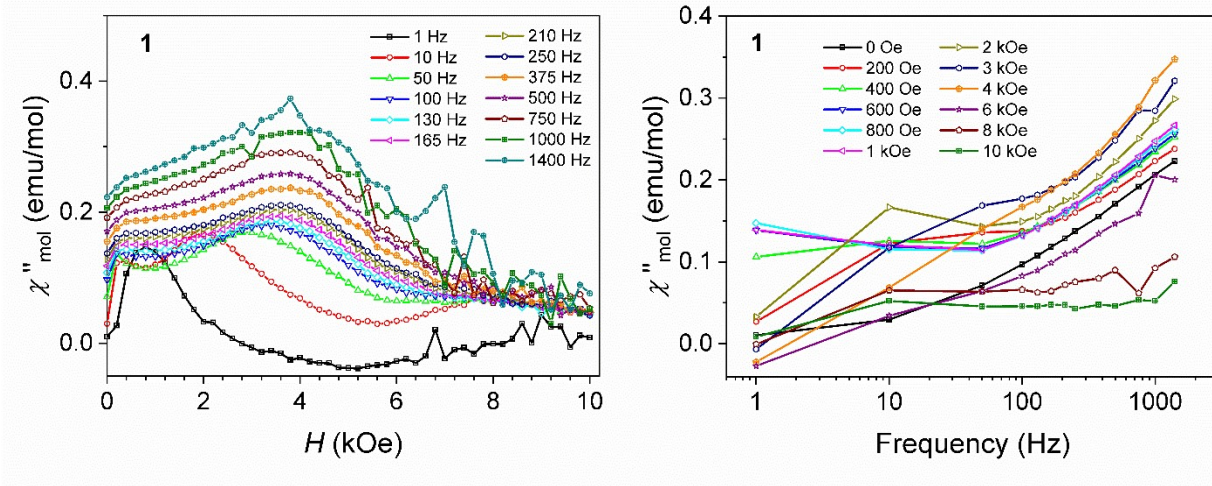

**Fig. S12.** Out-of-phase ac susceptibility as a function of dc magnetic field (left) and frequency (right) for 1 measured at 2 K.

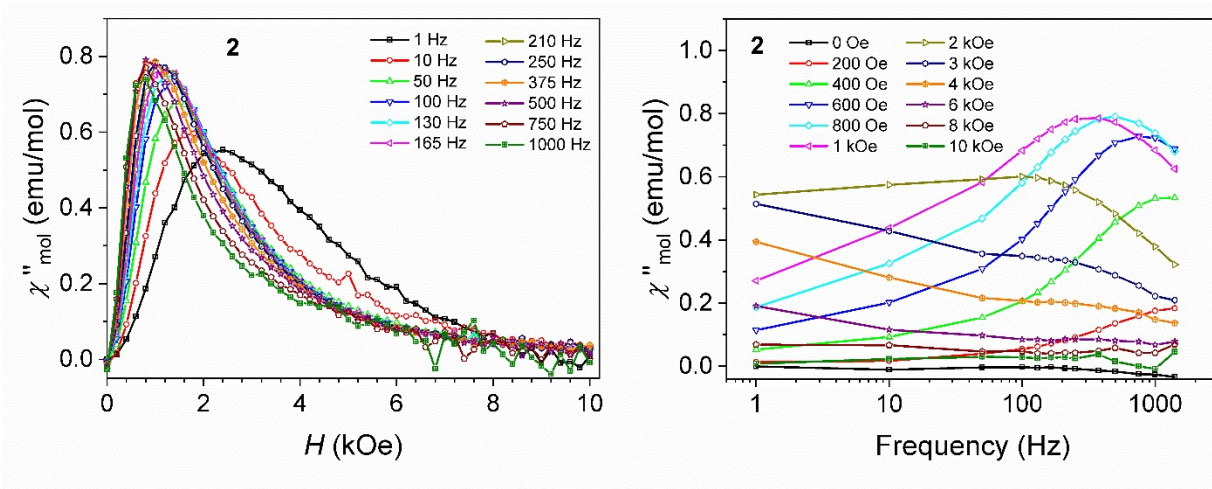

**Fig. S13.** Out-of-phase ac susceptibility as a function of dc magnetic field (left) and frequency (right) for 2 measured at 2 K.

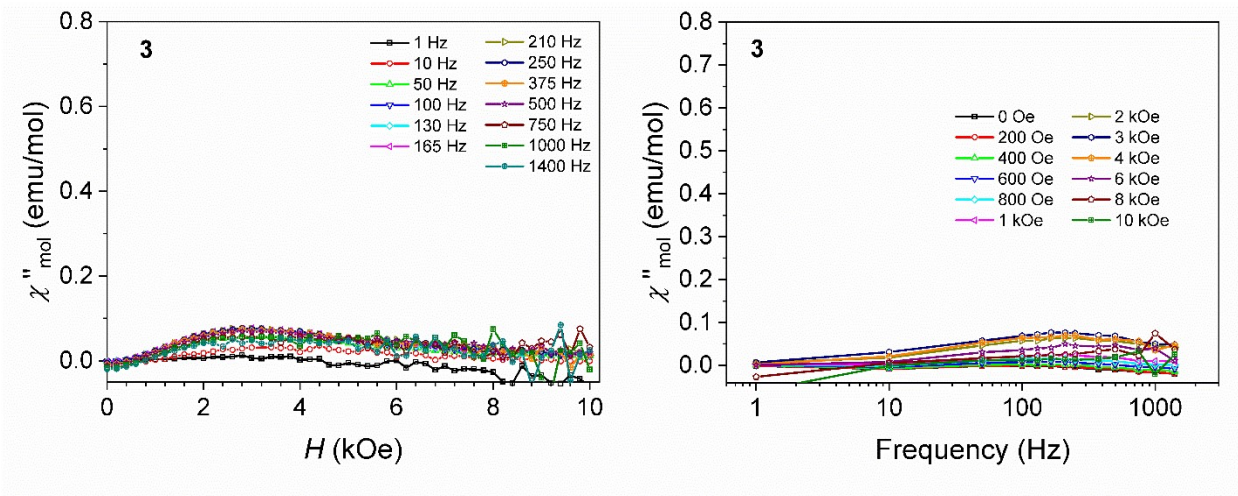

**Fig. S14.** Out-of-phase ac susceptibility as a function of dc magnetic field (left) and frequency (right) for 3 measured at 2 K.

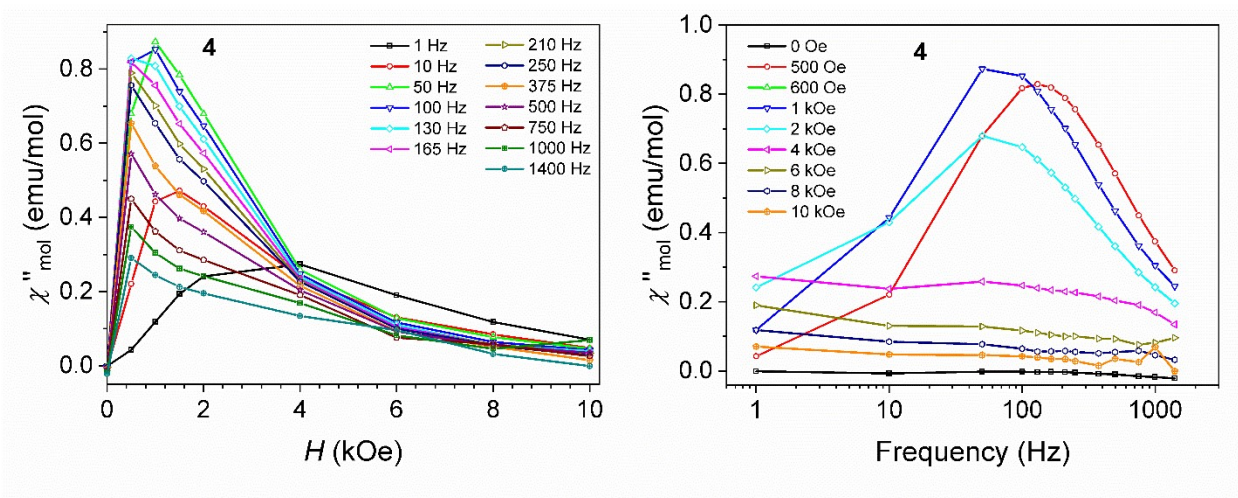

**Fig. S15.** Out-of-phase ac susceptibility as a function of dc magnetic field (left) and frequency (right) for 4 measured at 1.9 K.



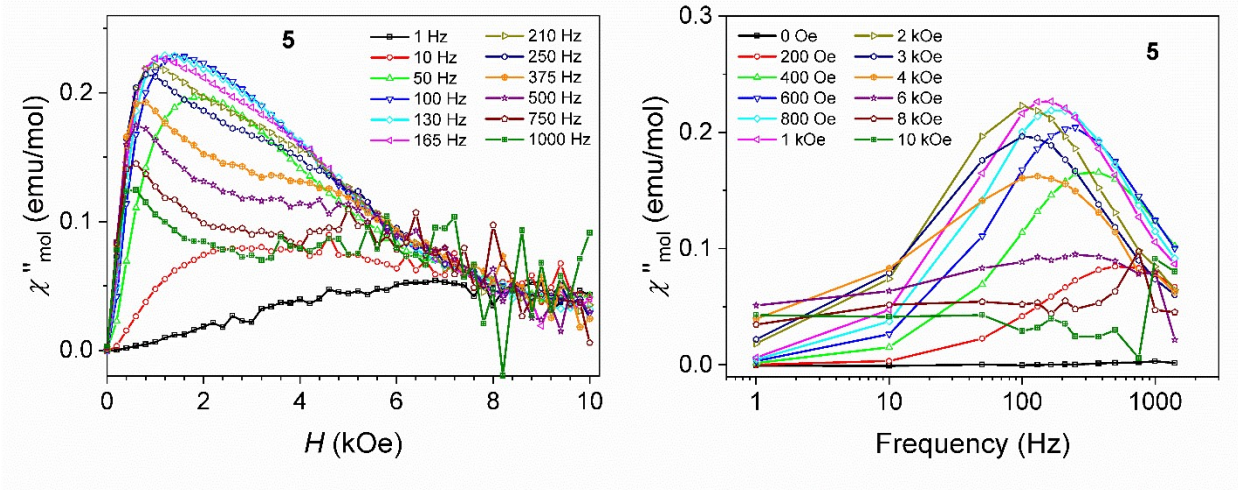

**Fig. S16.** Out-of-phase ac susceptibility as a function of dc magnetic field (left) and frequency (right) for **5** measured at 2 K.

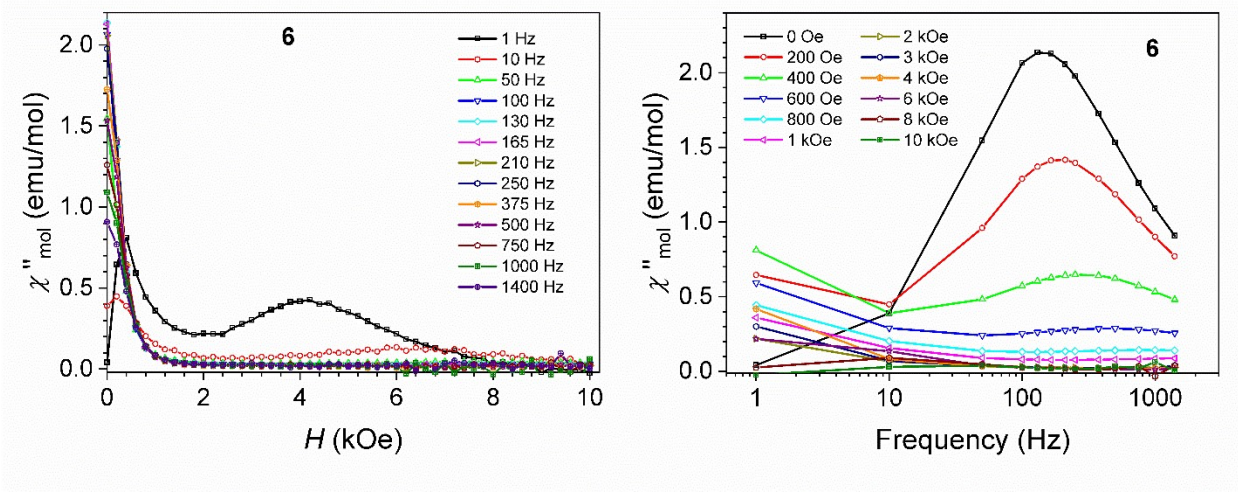

**Fig. S17.** Out-of-phase ac susceptibility as a function of dc magnetic field (left) and frequency (right) for **6** measured at 2 K.

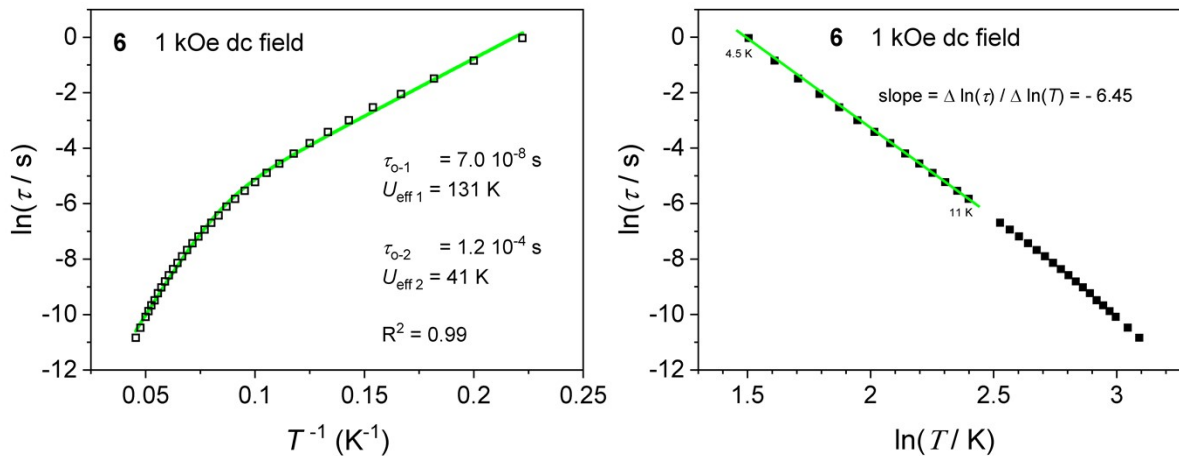

**Fig. S18.** The plot of magnetisation relaxation time in the form of  $\ln(\tau)$  vs.  $T^{-1}$  (left) and  $\ln(\tau)$  vs.  $\ln(T)$  (right); solid lines in the plots denoting the best fit considering only two Orbach like relaxations (left) and the linear fit (right); insets showing the best fit parameters.

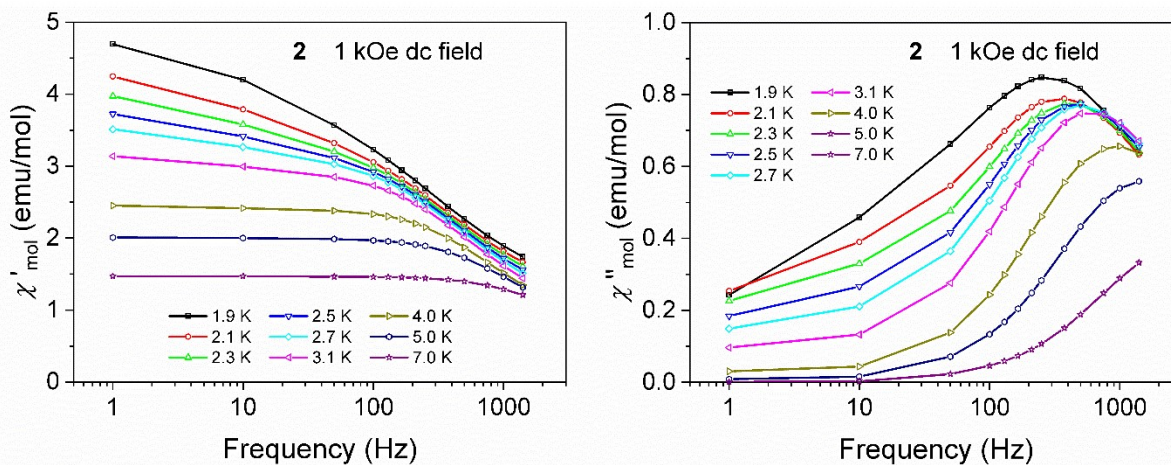

**Fig. S19.** Frequency dependent in-phase and out-of-phase ac susceptibility plots of **2** at indicated dc field.

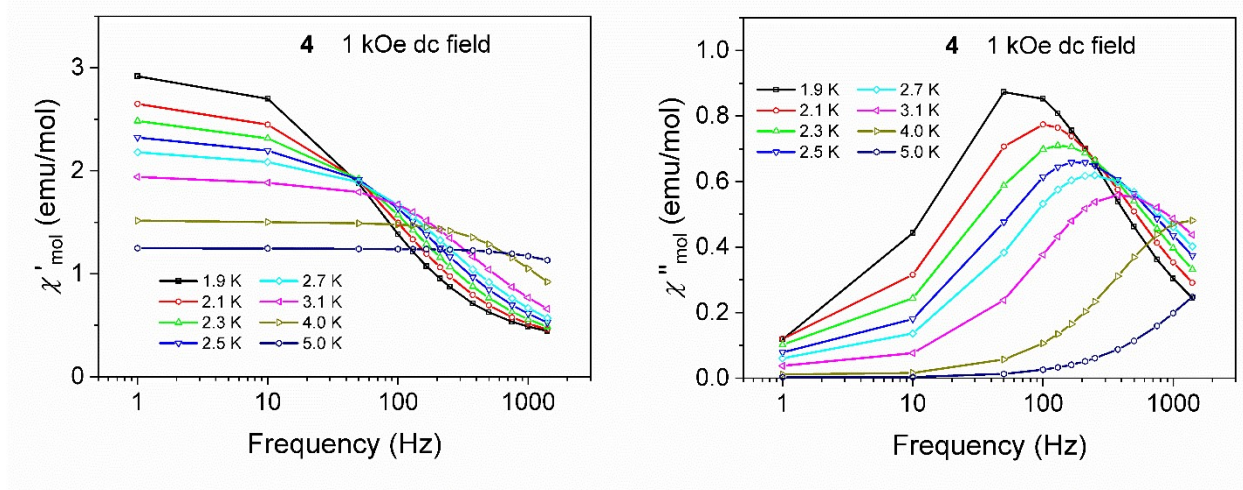

**Fig. S20.** Frequency dependent in-phase and out-of-phase ac susceptibility plots of **4** at indicated dc field.

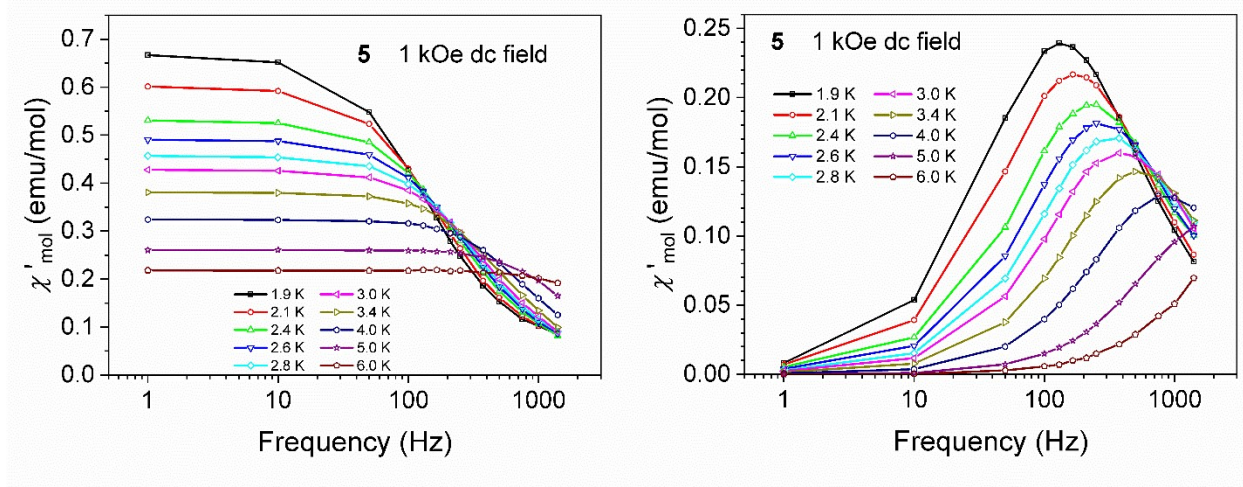

**Fig. S21.** Frequency dependent in-phase and out-of-phase ac susceptibility plots of **5** at indicated dc field.

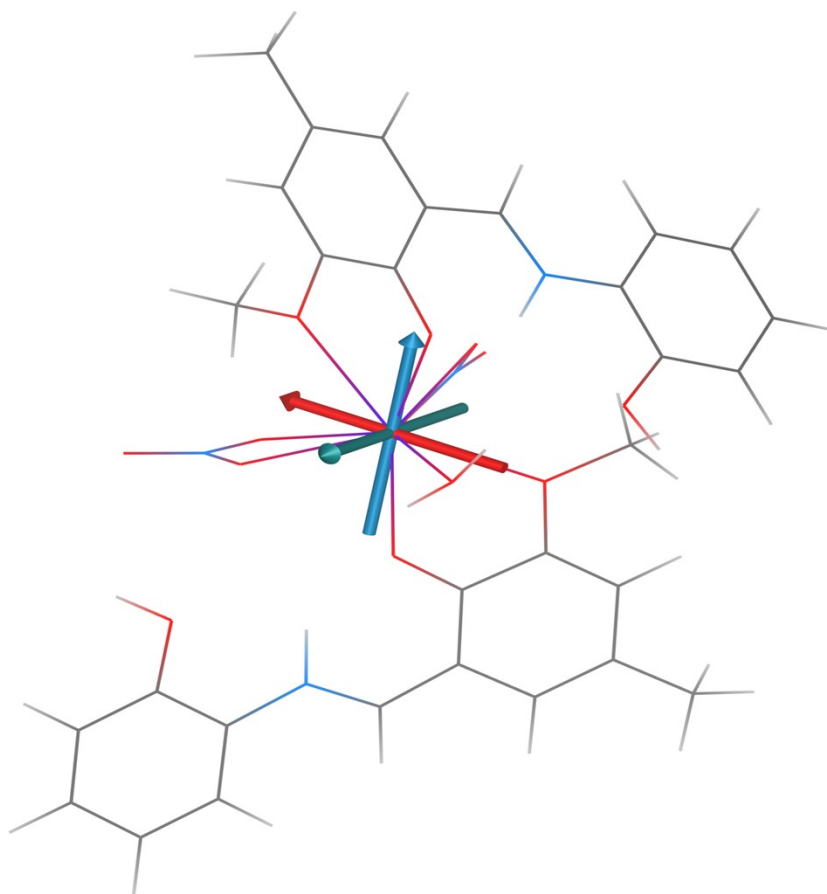

**Fig. S22** The molecular structure of complex **1** derived from the experimental X-ray geometry used for CASSCF calculations done in ORCA overlaid with principal axis of g-tensor of the first Kramers doublet (x/y/z-axes colored as red/green/blue arrows).

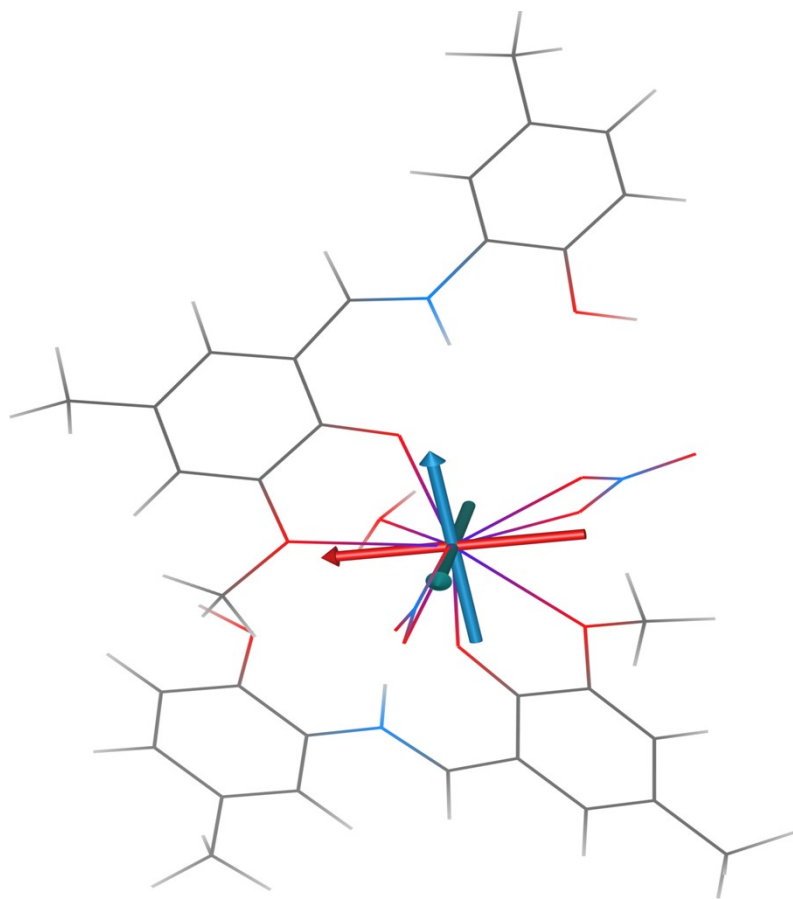

**Fig. S23** The molecular structure of complex **6** derived from the experimental X-ray geometry used for CASSCF calculations done in ORCA overlaid with principal axis of g-tensor of the first Kramers doublet (x/y/z-axes colored as red/green/blue arrows).

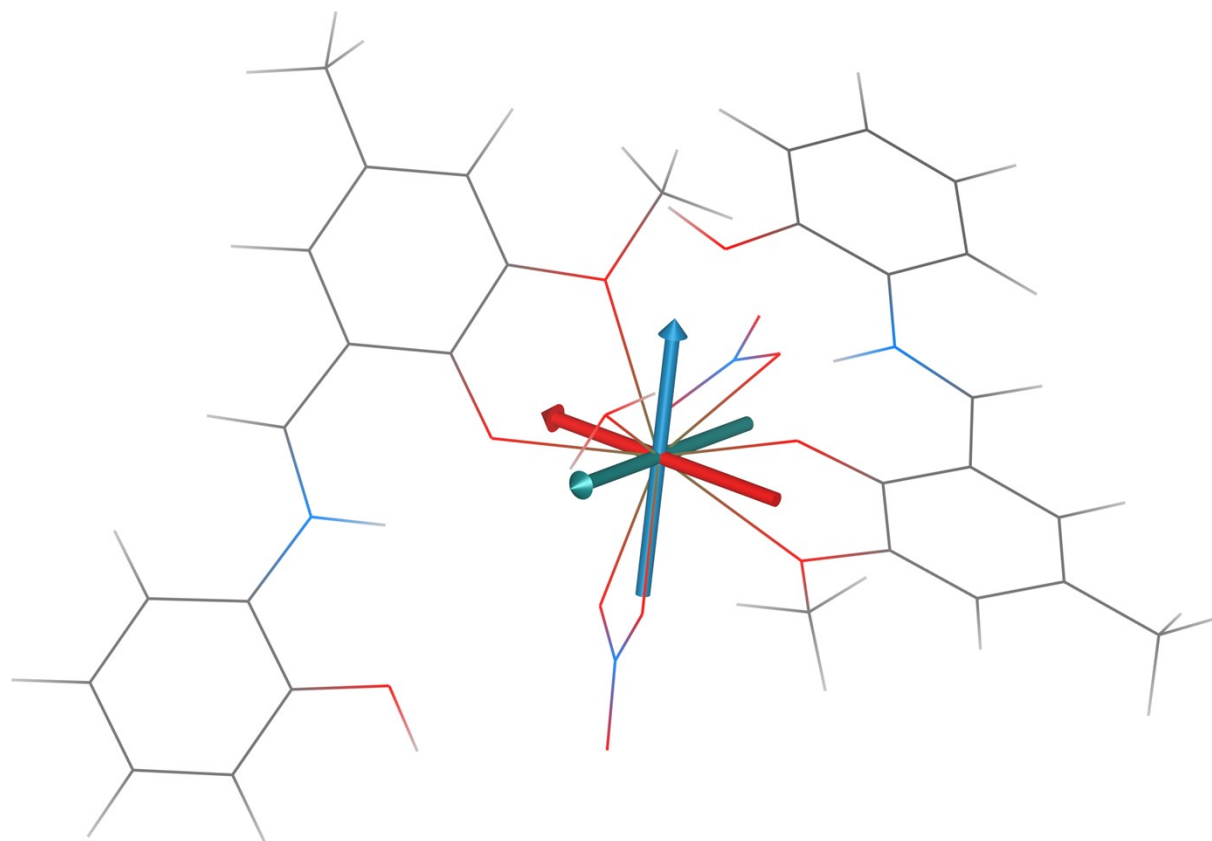

**Fig. S24** The molecular structure of complex **4** derived from the experimental X-ray geometry used for CASSCF calculations done in ORCA overlaid with principal axis of g-tensor of the first Kramers doublet (x/y/z-axes colored as red/green/blue arrows).

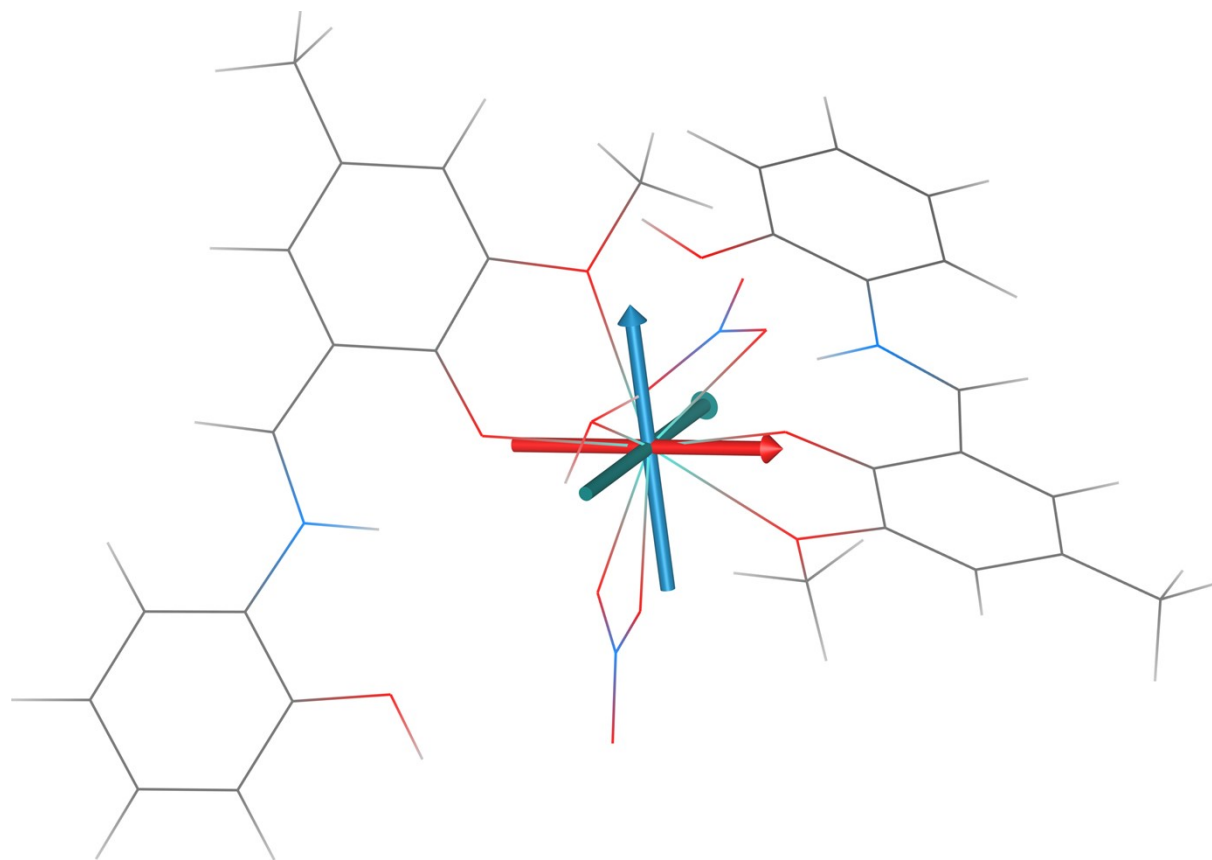

**Fig. S25** The molecular structure of complex **5** derived from the experimental X-ray geometry used for CASSCF calculations done in ORCA overlaid with principal axis of g-tensor of the first Kramers doublet (x/y/z-axes colored as red/green/blue arrows).

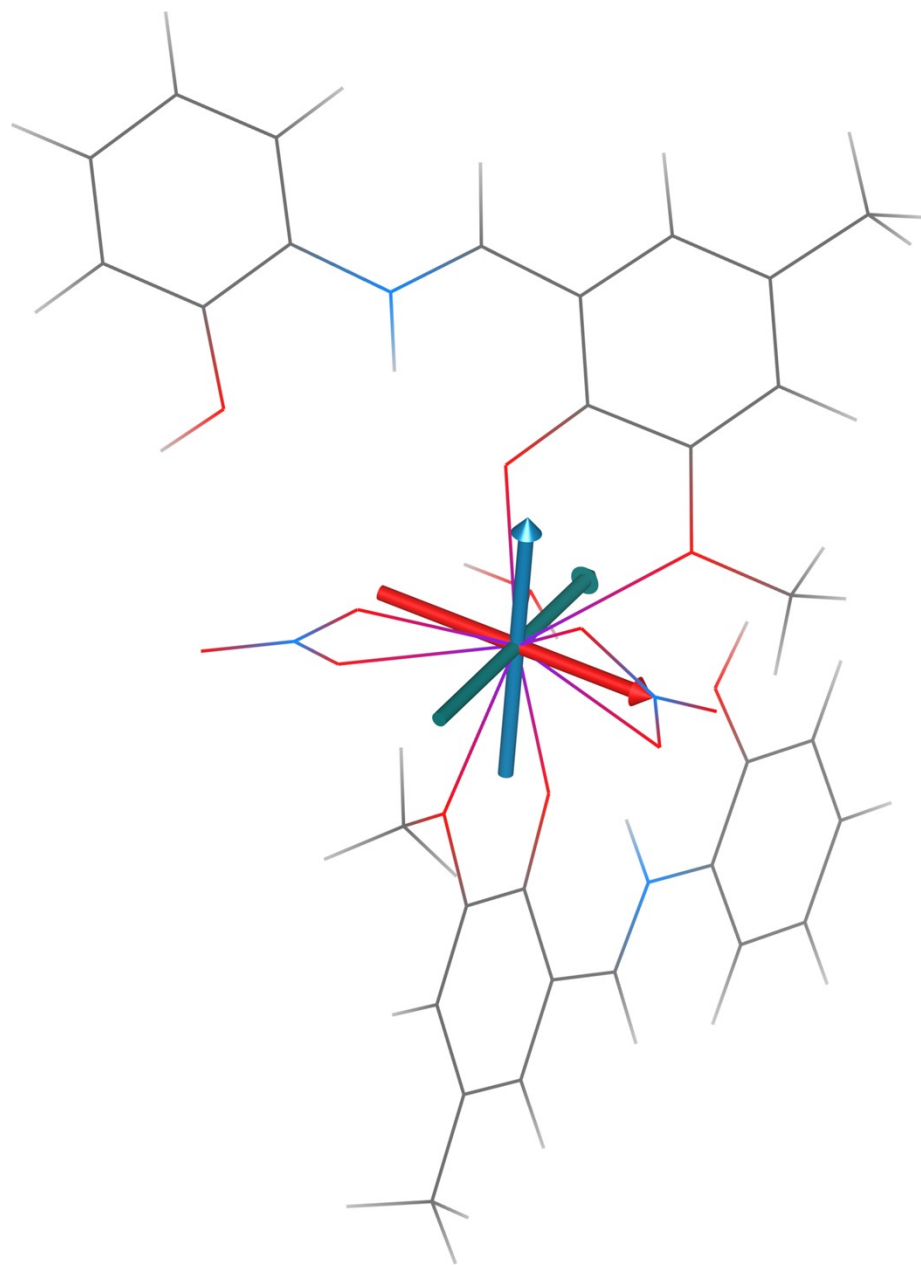

**Fig. S26** The molecular structure of complex **2** derived from the experimental X-ray geometry used for CASSCF calculations done in ORCA overlaid with principal axis of g-tensor of the first Kramers doublet (x/y/z-axes colored as red/green/blue arrows).



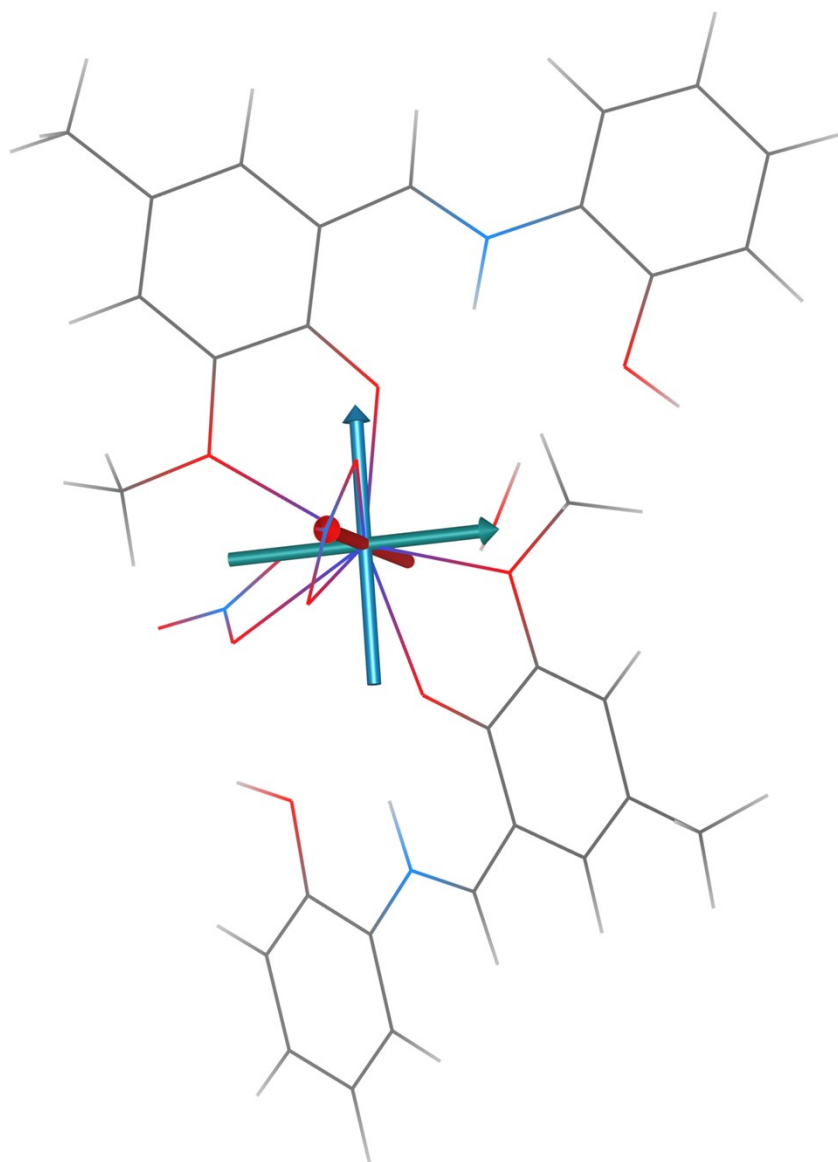

**Fig. S27** The molecular structure of complex **3** derived from the experimental X-ray geometry used for CASSCF calculations done in ORCA overlaid with principal axis of g-tensor of the first Kramers doublet (x/y/z-axes colored as red/green/blue arrows).

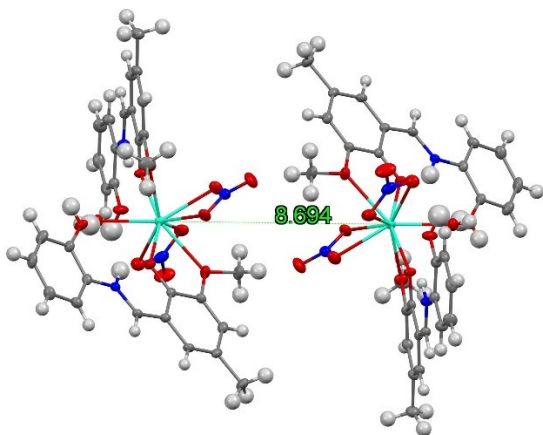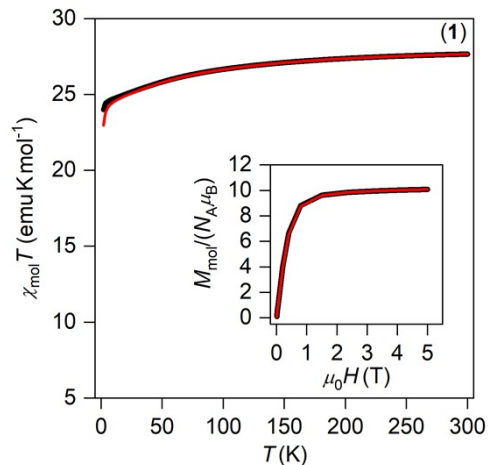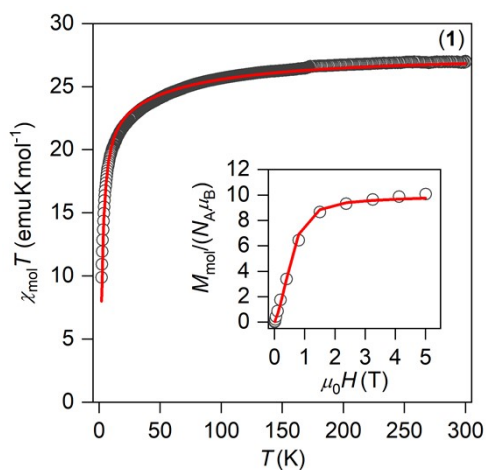

**Fig. S28** The analysis of magnetic properties of **1** by POLY\_ANISO module. Top: The molecular structure of supramolecular dimer of **1** derived from the experimental X-ray geometry and calculated magnetic data for such dimer using POLY\_ANISO program based on respective CASSCF calculations without dipolar interaction (black line) / with dipolar interaction (red line). Bottom: The fit of experimental magnetic data utilizing CASSCF calculations, POLY\_ANISO program and homemade routine with the exchange parameter  $J_{Dy-Dy} = -0.180 \text{ cm}^{-1}$ , scaling factor for calculated data: 0.973.

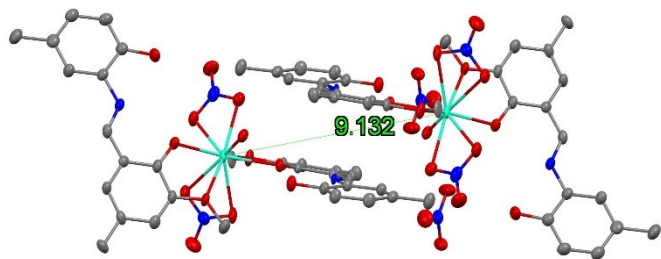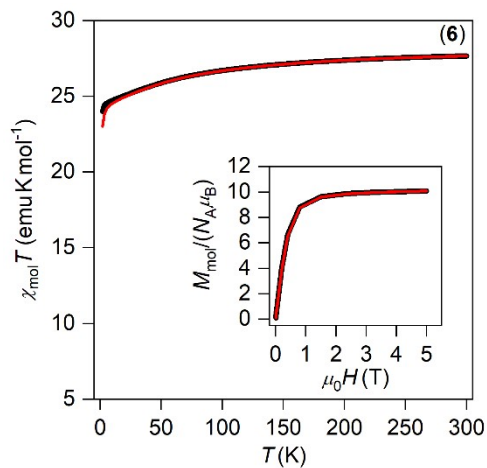

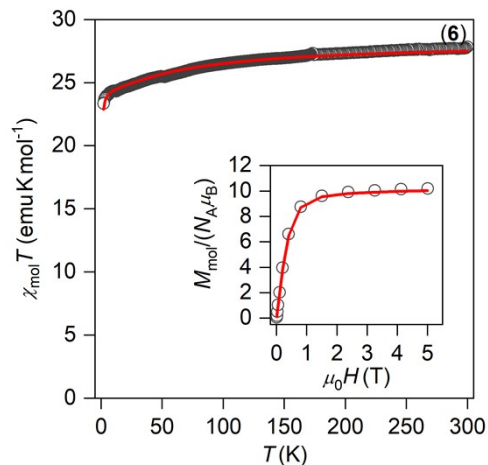

**Fig. S29** The analysis of magnetic properties of **6** by POLY\_ANISO module. *Top*: The molecular structure of supramolecular dimer of **6** derived from the experimental X-ray geometry and calculated magnetic data for such dimer using POLY\_ANISO program based on respective CASSCF calculations without dipolar interaction (black line) / with dipolar interaction (red line). *Bottom*: The fit of experimental magnetic data utilizing CASSCF calculations, POLY\_ANISO program and homemade routine with the exchange parameter  $J_{\text{Dy-Dy}} = -0.0024 \text{ cm}^{-1}$ , scaling factor for calculated data: 0.994.

#### References:

- S1 K. S. Pedersen, J. Dreiser, H. Weihe, R. Sibille, H. V. Johannesen, M. A. Sørensen, B. E. Nielsen, M. Sigrist, H. Mutka, S. Rols, J. Bendix and S. Piligkos, *Inorg. Chem.*, 2015, **54**, 7600–7606.
- S2 J. R. Jimenez, I. F. Diaz-Ortega, E. Ruiz, D. Aravena, S. J. A. Pope, E. Colacio and J. M. Herrera, *Chem. – Eur. J.*, 2016, **22**, 14548–14559.
- S3 D.-Q. Wu, D. Shao, X.-Q. Wei, F.-X. Shen, L. Shi, Y.-Q. Zhang and X.-Y. Wang, *Dalton Trans.*, 2017, **46**, 12884–12892.
- S4 A. V. Gavrikov, N. N. Efimov, Z. V. Dobrokhotova, A. B. Ilyukhin, P. N. Vasilyev and V. M. Novotortsev, *Dalton Trans.*, 2017, **46**, 11806–11816.

- S5 G. Peng, Y. Y. Zhang, B. Li, X. F. Sun, H. L. Cai, D. J. Li, Z. G. Gu and G. E. Kostakis, *Dalton Trans.*, 2018, **47**, 17349–17356.
- S6 Q. Zou, X.-D. Huang, J.-C. Liu, S.-S. Bao and L.-M. Zheng, *Dalton Trans.*, 2019, **48**, 2735–2740.
- S7 S. P. Petrosyants, K. A. Babeshkin, A. V. Gavrikov, A. B. Ilyukhin, E. V. Belova and N. N. Efimov, *Dalton Trans.*, 2019, **48**, 12644–12655.
- S8 A. Borah, S. Dey, S. K. Gupta, M. G. Walawalkar, G. Rajaraman and R. Murugavel, *Chem. Commun.*, 2020, **56**, 11879–11882.
